# Supplementary material for: Unique halogen–π association detected in single crystals of C–N atropisomeric N-(2-halophenyl)quinolin-2-one derivatives and the thione analogue
Source: publisher site journal article supplement (doi:10.3762/bjoc.21.138), 2025-09-01

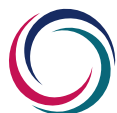

## Supporting Information

for

### Unique halogen– $\pi$ association detected in single crystals of C–N atropisomeric *N*-(2-halophenyl)quinolin-2-one derivatives and the thione analogue

Mai Uchibori, Nanami Murate, Kanako Shima, Tatsunori Sakagami, Ko Kanehisa, Gary James Richards, Akiko Hori and Osamu Kitagawa

*Beilstein J. Org. Chem.* **2025**, *21*, 1748–1756. doi:10.3762/bjoc.21.138

**Experimental procedures for synthesis of compounds 1–4 and their spectral data, copies of  $^1\text{H}$  and  $^{13}\text{C}\{^1\text{H}\}$  NMR charts of compounds 1–4, chiral MPLC and HPLC chart in compounds 1a,b, 2a, evaluation of rotational barriers of compounds 1a,b, and X-ray crystal data of *rac*-1a,b, (*P*)-1a,b, *rac*-2a (check CIF)**

## Table of Contents

|                                                                                                                 |         |
|-----------------------------------------------------------------------------------------------------------------|---------|
| Experimental procedures for synthesis of compounds <b>1–4</b> and their spectral data                           | S2–S4   |
| Copies of $^1\text{H}$ and $^{13}\text{C}\{^1\text{H}\}$ NMR charts of compounds <b>1–4</b>                     | S5–S11  |
| Chiral MPLC and HPLC charts of compounds <b>1a,b</b> and <b>2a</b>                                              | S12–S19 |
| Evaluation of rotational barriers of compounds <b>1a</b> and <b>1b</b>                                          | S20–S21 |
| X-ray crystal data of <i>rac</i> - <b>1a,b</b> , ( <i>P</i> )- <b>1a,b</b> , <i>rac</i> - <b>2a</b> (check CIF) | S22–S41 |

## EXPERIMENTAL SECTION

### Experimental procedures for synthesis of compounds 1–4 and their spectral data

Melting points were recorded on a melting point apparatus and are uncorrected.  $^1\text{H}$  and  $^{13}\text{C}$  NMR spectra were recorded on 400 MHz and 101 MHz spectrometer. Chemical shifts  $\delta$  were given in ppm and coupling constants  $J$  in Hz.  $^1\text{H}$  and  $^{13}\text{C}$  NMR chemical shifts were determined using residual signals of the deuterated solvents:  $\text{CDCl}_3$  ( $^1\text{H}$ :  $\delta = 7.26$  ppm,  $^{13}\text{C}$ :  $\delta = 77.0$  ppm). HRMS were recorded on a double focusing magnetic sector mass spectrometer using ESI-TOF. Optical rotations were measured in  $\text{CHCl}_3$  on JASCO P-1020 Polarimeter at  $\lambda = 589$  nm.  $[\alpha]_D$  values were reported at 25 °C in degree·cm<sup>2</sup>·g<sup>-1</sup> with concentrations reported in g/100 mL. Column chromatography was performed on silica gel (63–210  $\mu\text{m}$ ). Medium-pressure liquid chromatography (MPLC) was performed on a 25  $\times$  4 cm i. d. prepacked column (silica gel, 10  $\mu\text{m}$ ) with a UV detector. High-performance liquid chromatography (HPLC) was performed on a 25  $\times$  0.4 cm i. d. chiral column with a UV detector. The single crystal X-ray structure was determined by a Bruker D8 Quest with  $\text{MoK}\alpha$  radiation ( $\lambda = 0.71073$  Å) generated at 50 kV and 1 mA. The crystal was coated by paratone-N oil and measured at 100 K.

***N*-(2-Bromophenyl)-3-(2-iodophenyl)propanamide (3a).** Under a  $\text{N}_2$  atmosphere, to 3-(2-iodophenyl)propanoic acid (552 mg, 2.0 mmol) and 3-ethylcarbodiimide hydrochloride (575 mg, 3.0 mmol) was added 2-bromoaniline (0.23 mL, 2.1 mmol) in  $\text{CH}_2\text{Cl}_2$  (0.8 mL) at 0 °C and then the mixture was stirred for 5 h at rt. The mixture was poured into 2 N HCl aq and extracted with AcOEt. The AcOEt extracts were washed with brine, dried over  $\text{MgSO}_4$ , and evaporated to dryness in vacuo. Purification of the residue by column chromatography (hexane/AcOEt = 8) gave **3a** (561 mg, 65%). **3a**: white solid; mp 150–151 °C; IR (neat) 3265, 3254, 1659  $\text{cm}^{-1}$ ;  $^1\text{H}$  NMR (400 MHz,  $\text{CHCl}_3$ )  $\delta$ : 8.36 (1H, d,  $J = 8.0$  Hz), 7.83 (1H, dd,  $J = 8.4, 1.0$  Hz), 7.62 (1H, brs), 7.51 (1H, dd,  $J = 8.0, 1.2$  Hz), 7.26–7.33 (3H, m), 6.96 (1H, td,  $J = 8.0, 1.6$  Hz), 6.92 (1H, m), 3.18 (2H, t,  $J = 8.0$  Hz), 2.72 (2H, t,  $J = 8.0$  Hz);  $^{13}\text{C}\{^1\text{H}\}$  NMR (101 MHz,  $\text{CHCl}_3$ )  $\delta$ : 169.8, 142.7, 139.6, 135.5, 132.2, 129.7, 128.6, 128.33, 128.32, 125.1, 121.9, 113.2, 100.2, 38.1, 36.6; MS (ESI-TOF)  $m/z$ :  $[\text{MH}]^+$  430; HRMS (ESI-TOF)  $m/z$ :  $[\text{MH}]^+$  Calcd for  $\text{C}_{15}\text{H}_{14}^{79}\text{BrINO}$  429.9303; Found 429.9305.

***N*-(2-Chlorophenyl)-3-(2-bromophenyl)propanamide (3b).** **3b** was prepared from 3-(2-bromophenyl)propanoic acid (687 mg, 3.0 mmol) and 2-chloroaniline (0.30 mL, 2.8 mmol) in accordance with the experimental procedure for the synthesis of **3a**. Purification of the residue by column chromatography (hexane/AcOEt = 11) gave **3b** (687 mg, 68%). **3b**: white solid; mp 126 °C; IR (neat) 3271, 1659  $\text{cm}^{-1}$ ;  $^1\text{H}$  NMR (400 MHz,  $\text{CHCl}_3$ )  $\delta$ : 8.38 (1H, d,  $J = 8.0$  Hz), 7.57 (1H, brs), 7.56 (1H, dd,  $J = 8.0, 1.2$  Hz), 7.22–7.36 (4H, m), 7.09 (1H, td,  $J = 8.0, 1.6$  Hz), 7.03 (1H, td,  $J = 8.0, 1.6$  Hz), 3.20 (2H, t,  $J = 7.8$  Hz), 2.76 (2H, t,  $J = 7.8$  Hz);  $^{13}\text{C}\{^1\text{H}\}$  NMR (101

MHz, CHCl<sub>3</sub>)  $\delta$ : 170.0, 139.5, 134.4, 132.9, 130.7, 128.9, 128.2, 127.73, 127.70, 124.6, 124.3, 122.5, 121.6, 37.7, 32.0; MS (ESI-TOF) [MH]<sup>+</sup> 338; HRMS (ESI-TOF) *m/z*: [MH]<sup>+</sup> Calcd for C<sub>15</sub>H<sub>14</sub><sup>79</sup>BrClNO 337.9947; Found 337.9943.

**1-(2-Bromophenyl)-3,4-dihydroquinolin-2(1*H*)-one (4a).** Under a N<sub>2</sub> atmosphere, to *rac*-BINAP (98 mg, 0.16 mmol), Pd(OAc)<sub>2</sub> (23 mg, 0.1 mmol) and Cs<sub>2</sub>CO<sub>3</sub> (1.312 g, 4.0 mmol) was added toluene (10 mL), and then the mixture was stirred for 15 min at rt. **3a** (866 mg, 2.0 mmol) was added to the mixture. After being stirred for 17 h at 90 °C (oil bath), the mixture was poured into 2N HCl aq and extracted with AcOEt. The AcOEt extracts were washed with brine, dried over MgSO<sub>4</sub>, and evaporated to dryness in vacuo. Purification of the residue by column chromatography (hexane/AcOEt = 6) gave **4a** (388 mg, 64%). <sup>1</sup>H NMR and <sup>13</sup>C NMR spectra of **4a** coincided with those described in the literature.<sup>1</sup>

**1-(2-Chlorophenyl)-3,4-dihydroquinolin-2(1*H*)-one (4b).** **4b** was prepared from **3b** (215 mg, 0.63 mmol) in accordance with the experimental procedure for the synthesis of **4a**. Purification of the residue by column chromatography (hexane/AcOEt = 3) gave **4b** (151 mg, 92%). <sup>1</sup>H NMR and <sup>13</sup>C NMR spectra of **4b** coincided with those described in the literature.<sup>1</sup>

**1-(2-Bromophenyl)quinolin-2(1*H*)-one (rac-1a).** Under a N<sub>2</sub> atmosphere, to NBS (316 mg, 1.8 mmol) and AIBN (12 mg, 0.07 mmol) was added **4a** (215 mg, 0.7 mmol) in CCl<sub>4</sub> (4.0 mL). The mixture was stirred for 2 h at 80 °C (oil bath). The mixture was poured into saturated Na<sub>2</sub>S<sub>2</sub>O<sub>3</sub> aq and extracted with AcOEt. The AcOEt extracts were washed with brine, dried over MgSO<sub>4</sub>, and evaporated to dryness in vacuo. Purification of the residue by column chromatography (hexane/AcOEt = 3) gave *rac*-**1a** (106 mg, 50%). <sup>1</sup>H NMR and <sup>13</sup>C NMR spectra of *rac*-**1a** coincided with those described in the literature.<sup>2</sup>

**1-(2-Chlorophenyl)quinolin-2(1*H*)-one (rac-1b).** *Rac*-**1b** was prepared from **4b** (258 mg, 1.0 mmol) in accordance with the experimental procedure for the synthesis of *rac*-**1a**. Purification of the residue by column chromatography (hexane/AcOEt = 3) gave *rac*-**1b** (211 mg, 82%). <sup>1</sup>H NMR and <sup>13</sup>C NMR spectra of *rac*-**1b** coincided with those described in the literature.<sup>2</sup>

**Enantiomer separation of rac-1a.** Enantiomers of *rac*-**1a** were separated by MPLC using a chiral semi-preparative IH column [eluent: 15% IPA in hexane, flow rate, 4.0 mL/min; (*P*)-**1a**, *t<sub>R</sub>* = 18.0 min; (*M*)-**1a**, *t<sub>R</sub>* = 33.1 min]. The ee (99% ee) of (*P*)-**1a** and (*M*)-**1a** was determined by HPLC analysis using a chiral column (CHIRALPAK AD-H) [25 cm × 0.46 cm (inside diameter); 15% IPA in hexane; flow rate, 0.8 mL/min; (*P*)-**1a**, *t<sub>R</sub>* = 12.7 min; (*M*)-**1a**, *t<sub>R</sub>* = 20.1 min]. (*P*)-**1a**: white solid; mp 135–137 °C; [α]<sub>D</sub><sup>25</sup> = +93.9 ° (c = 0.32, CHCl<sub>3</sub>). (*M*)-**1a**: [α]<sub>D</sub><sup>25</sup> = –87.1 ° (c = 0.32, CHCl<sub>3</sub>).

**Enantiomer separation of rac-1b.** Enantiomers of *rac*-**1b** were separated by MPLC using a chiral semi-preparative IH column [eluent: 15% IPA in hexane, flow rate, 4.0 mL/min; (*P*)-**1b**, *t<sub>R</sub>* = 14.9 min; (*M*)-**1b**, *t<sub>R</sub>* = 30.1 min]. The ee (99% ee) of (*P*)-**1b** and (*M*)-**1b** was determined by

HPLC analysis using a chiral column (CHIRALPAK AD-H) [25 cm × 0.46 cm (inside diameter); 15% IPA in hexane; flow rate, 0.8 mL/min; (**P**)-**1b**,  $t_R$  = 11.3 min; (**M**)-**1b**,  $t_R$  = 18.2 min]. (**P**)-**1b**: white solid; mp 158–159 °C;  $[\alpha]_D^{25} = +94.0^\circ$  ( $c = 0.33$ , CHCl<sub>3</sub>). (**M**)-**1b**:  $[\alpha]_D^{25} = -82.2^\circ$  ( $c = 0.33$ , CHCl<sub>3</sub>)

**1-(2-Bromophenyl)quinoline-2(1H)-thione (rac-2a).** Under a N<sub>2</sub> atmosphere, to Lawesson's reagent (211 mg, 0.52 mmol) was added **rac-1a** (105 mg, 0.35 mmol) in toluene (4.5 mL). The mixture was stirred for 6 h at under refluxing toluene (oil bath 130 °C). The mixture was poured into H<sub>2</sub>O and extracted with AcOEt. The AcOEt extracts were washed with brine, dried over MgSO<sub>4</sub>, and evaporated to dryness in vacuo. Purification of the residue by column chromatography (hexane/AcOEt = 8) gave **rac-2a** (105 mg, 95%). **rac-2a**: yellow solid; mp 149–150 °C; IR (neat) 1609, 1553 cm<sup>-1</sup>; <sup>1</sup>H NMR (400 MHz, CHCl<sub>3</sub>)  $\delta$ : 7.85 (1H, dd,  $J = 8.0, 1.6$  Hz), 7.69 (1H, dd,  $J = 7.6, 1.6$  Hz), 7.68 (1H, d,  $J = 9.2$  Hz), 7.57–7.61 (2H, m), 7.40–7.46 (2H, m), 7.30–7.34 (2H, m), 6.61 (1H, d,  $J = 8.4$  Hz) <sup>13</sup>C{<sup>1</sup>H} NMR (101 MHz, CHCl<sub>3</sub>)  $\delta$ : 185.0, 141.1, 140.4, 134.5, 133.6, 132.9, 131.1, 130.6, 130.2, 129.5, 128.4, 124.3, 123.7, 122.4, 116.5; MS (ESI-TOF)  $m/z$ : [MNa]<sup>+</sup> 340; HRMS (ESI-TOF)  $m/z$ : [MNa]<sup>+</sup> Calcd for C<sub>15</sub>H<sub>10</sub><sup>81</sup>BrNNaS 339.9595; Found 339.9601.

**Enantiomer separation of rac-2a.** Enantiomers of **rac-2a** were separated by MPLC using a chiral semi-preparative IH column (eluent: 5% IPA in hexane, flow rate, 4.0 mL/min; (+)-**2a**,  $t_R$  = 34.6 min; (–)-**2a**,  $t_R$  = 43.7 min]. The ee (99% ee) of (+)-**2a** and (–)-**2a** was determined by HPLC analysis using a chiral column (CHIRALPAK AS-H) [25 cm × 0.46 cm (inside diameter); 15% IPA in hexane; flow rate, 0.8 mL/min; (+)-**2a**,  $t_R$  = 20.1 min; (–)-**2a**,  $t_R$  = 26.1 min]. (+)-**2a**: amorphous solid;  $[\alpha]_D^{25} = +160.0^\circ$  ( $c = 0.20$ , CHCl<sub>3</sub>). (–)-**2a**:  $[\alpha]_D^{25} = -143^\circ$  ( $c = 0.20$ , CHCl<sub>3</sub>).

## (References)

1. Wu, L.; Zhou, H.; Sun, L.; Cui, J.; Liu, W.; Wang, Y.; Xie, L. Visible Light-Induced Photocatalyst-Free Aromatic Amidation for the Synthesis of 3,4-Dihydroquinolin-2(1H)-ones. *Russian J. Org. Chem.* **2024**, *60*, 459–466. <https://link.springer.com/article/10.1134/S1070428024030138>
2. Arunachalampillai, A.; Chandrappa, P.; Cherney, A.; Crockett, R.; Doerfler, J. Johnson, G.; Kommuri, V. C.; Kyad, A.; Macmanus, J. Murray, J. et al. Atroposelective Brønsted Acid-Catalyzed Photocyclization to Access Chiral N-Aryl Quinolones with Low Rotational Barriers. *Org. Lett.* **2023**, *25*, 5856–5861. <https://doi.org/10.1021/acs.orglett.3c02117>

## Copies of $^1\text{H}$ and $^{13}\text{C}\{^1\text{H}\}$ NMR charts of compounds 1–4

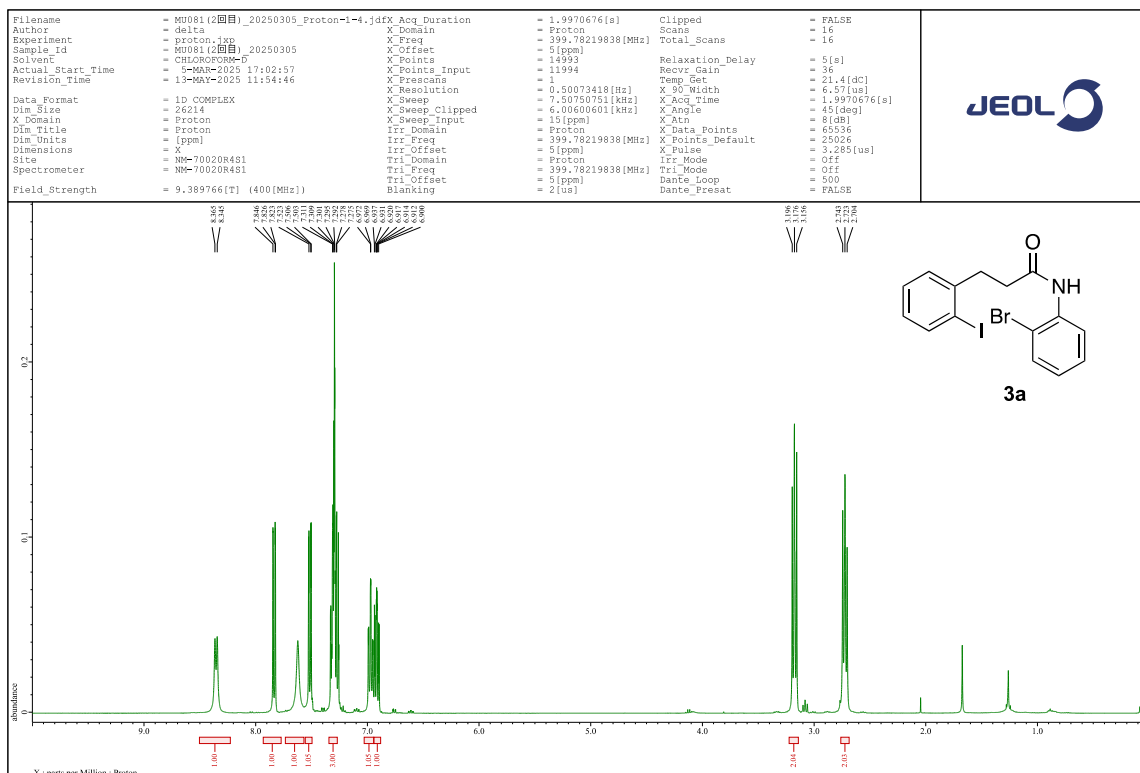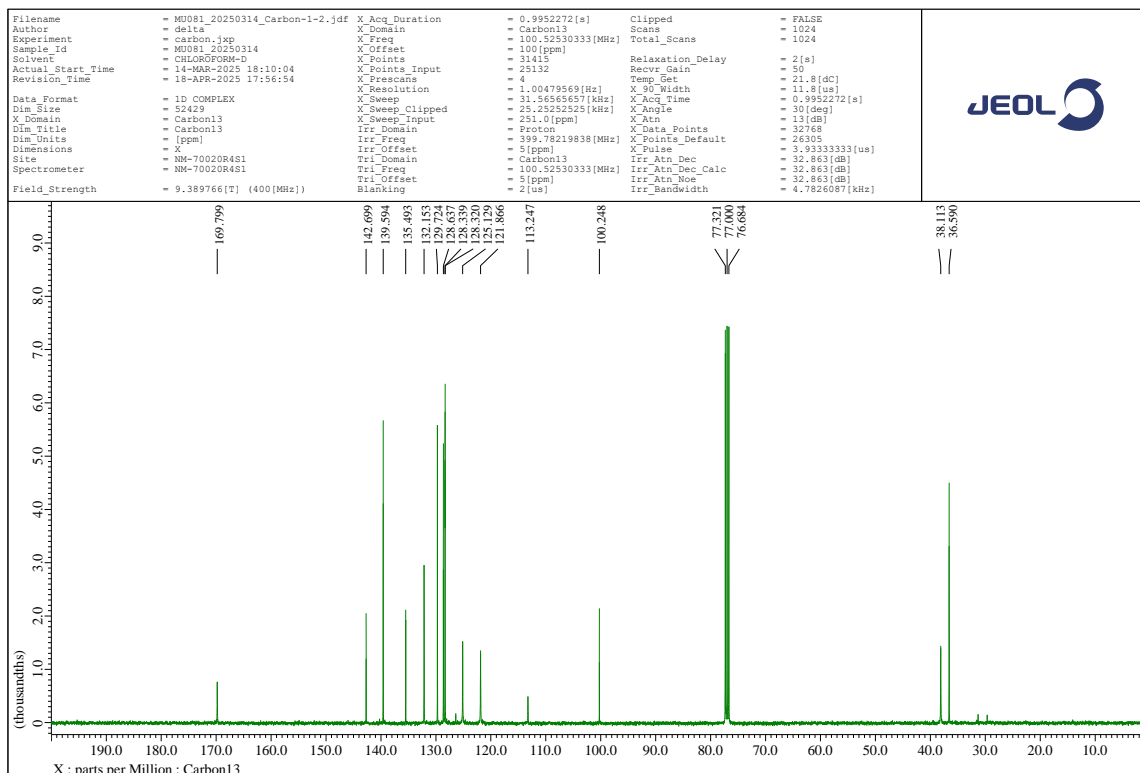

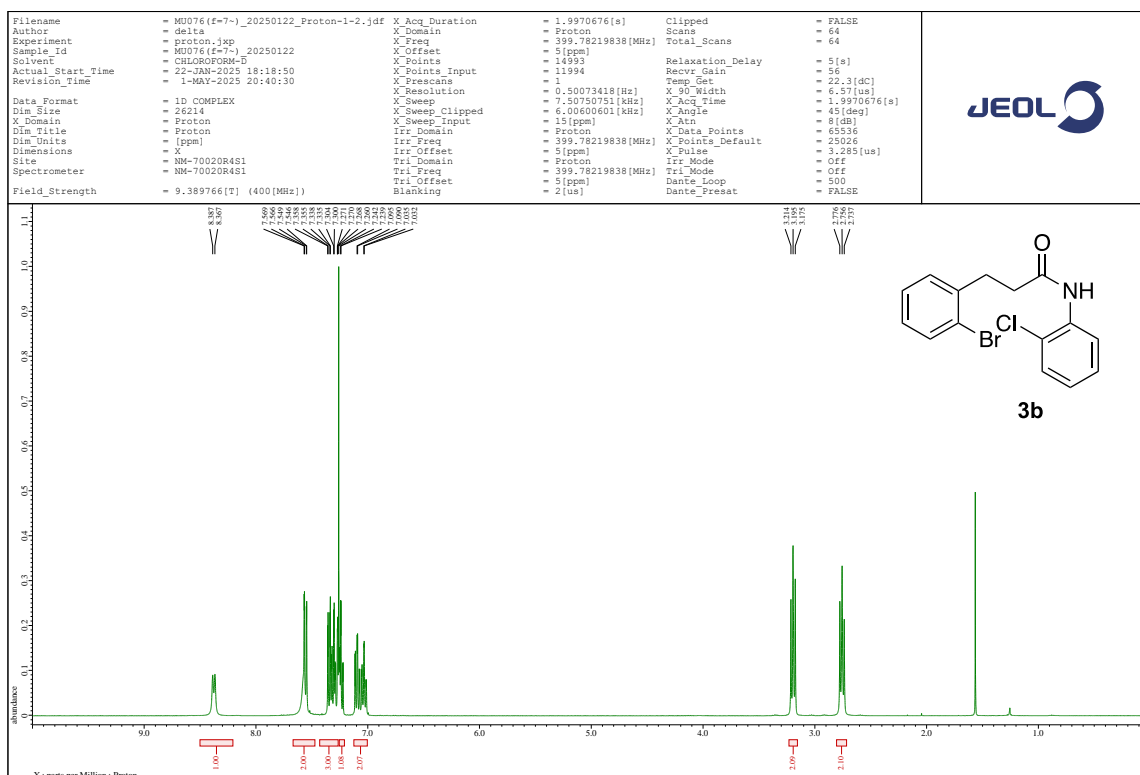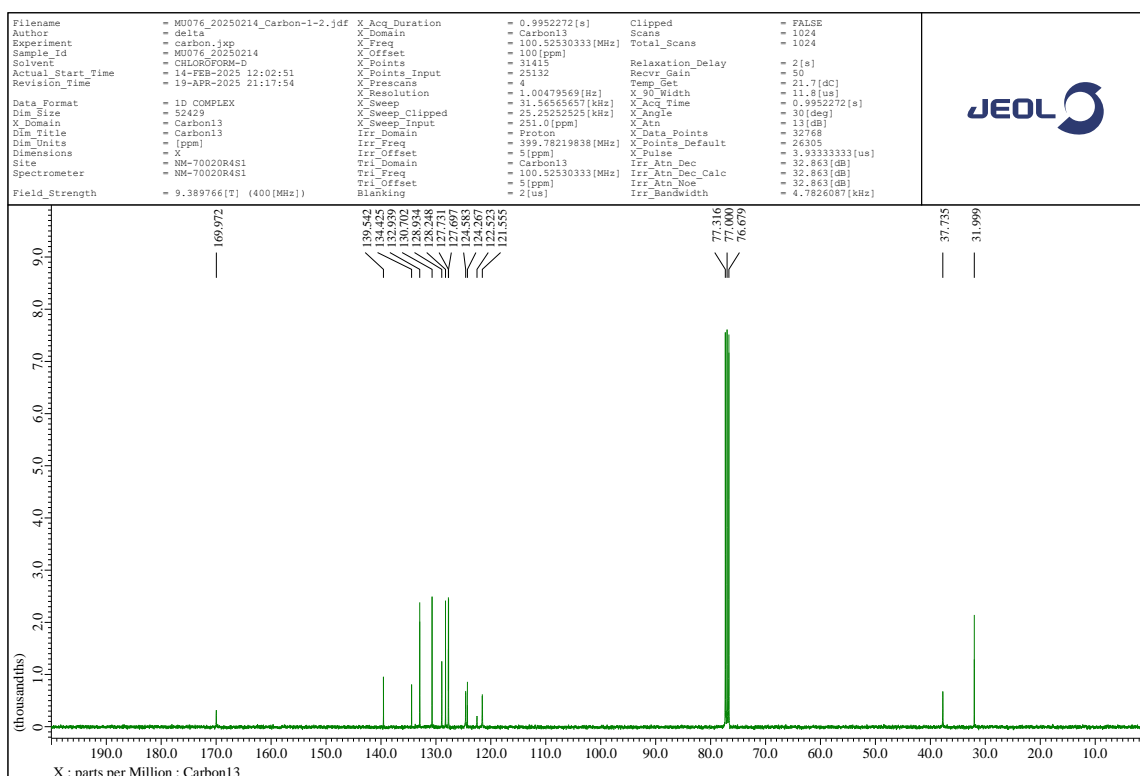

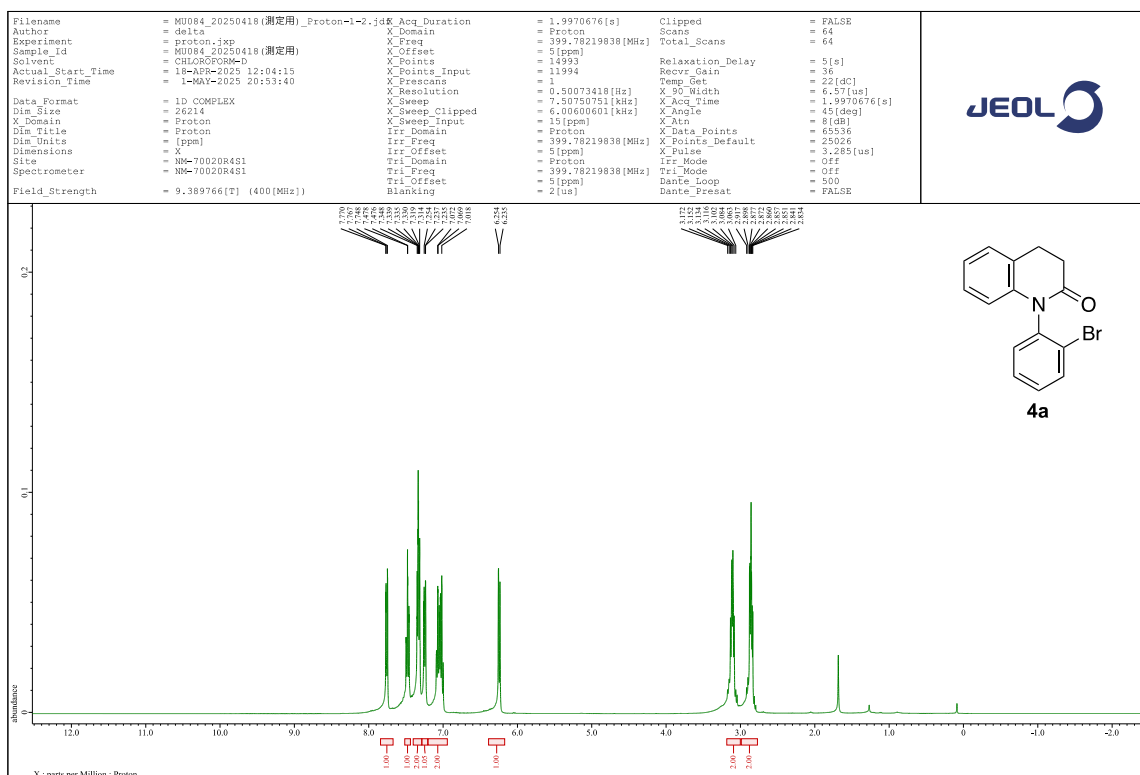



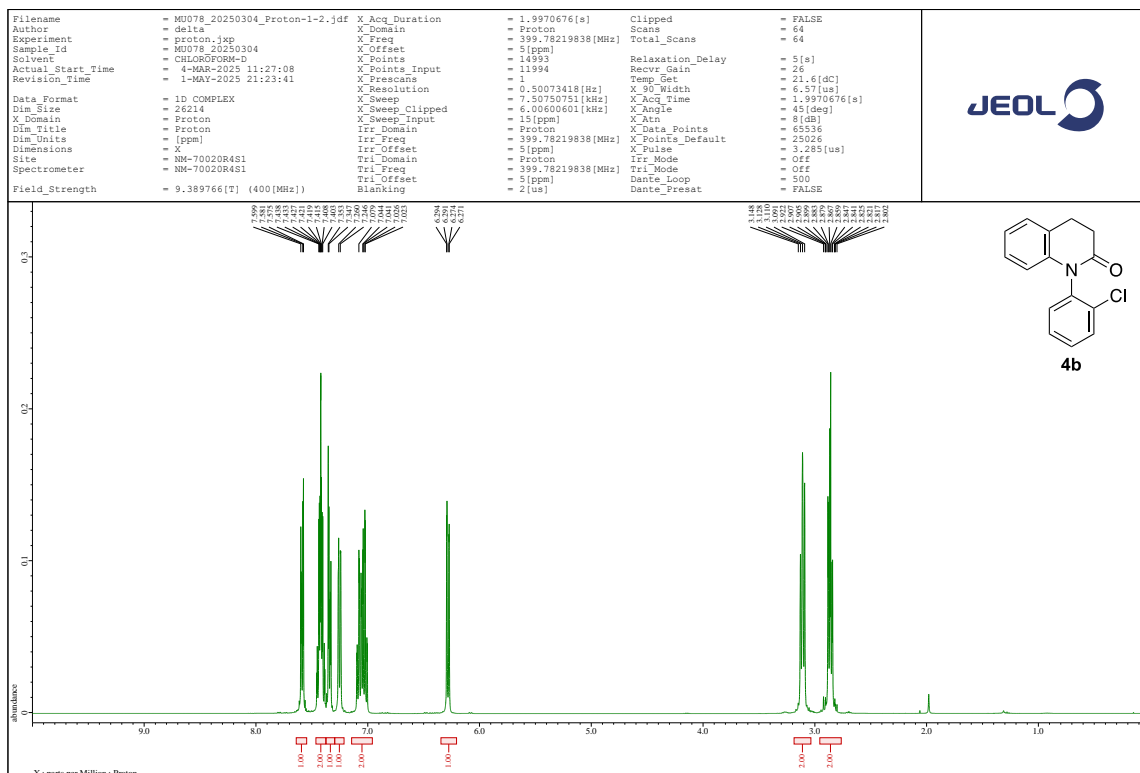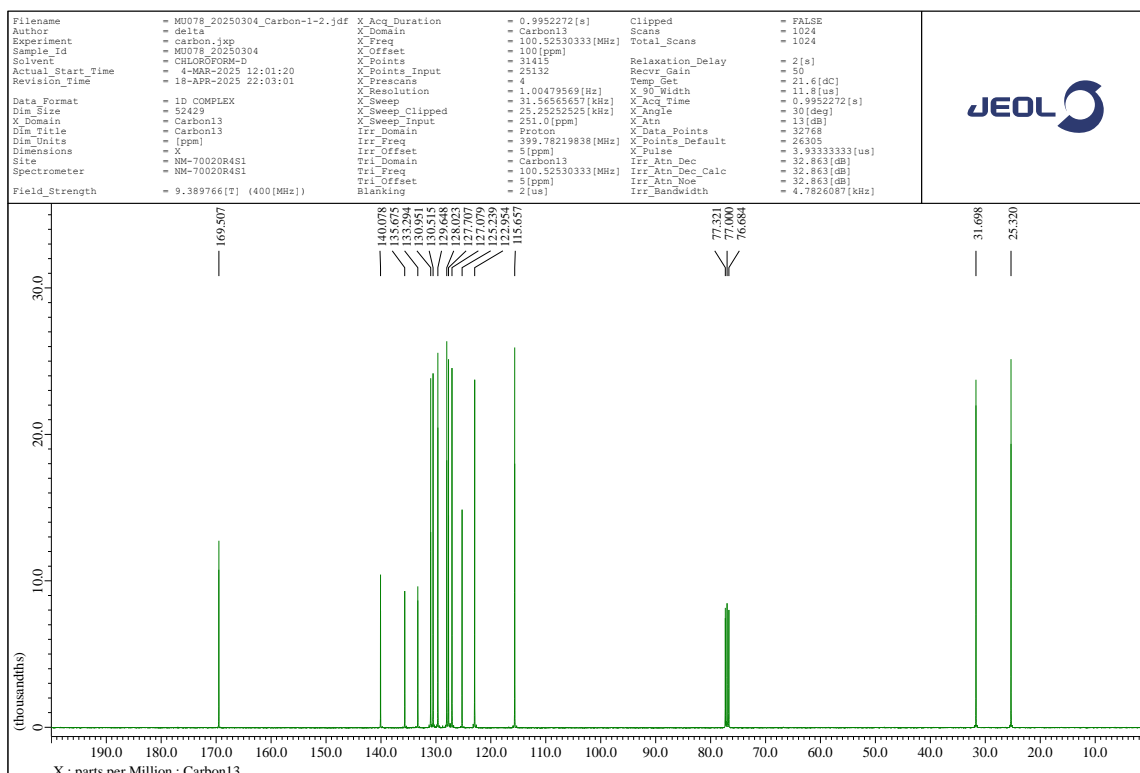

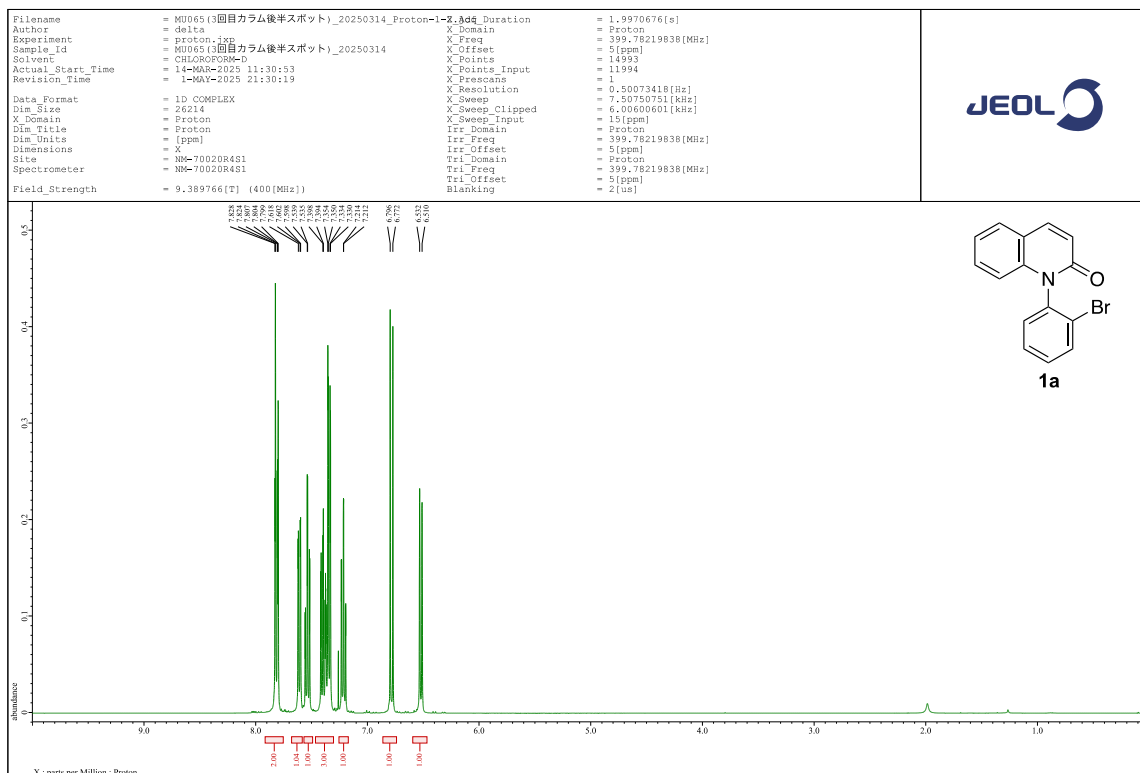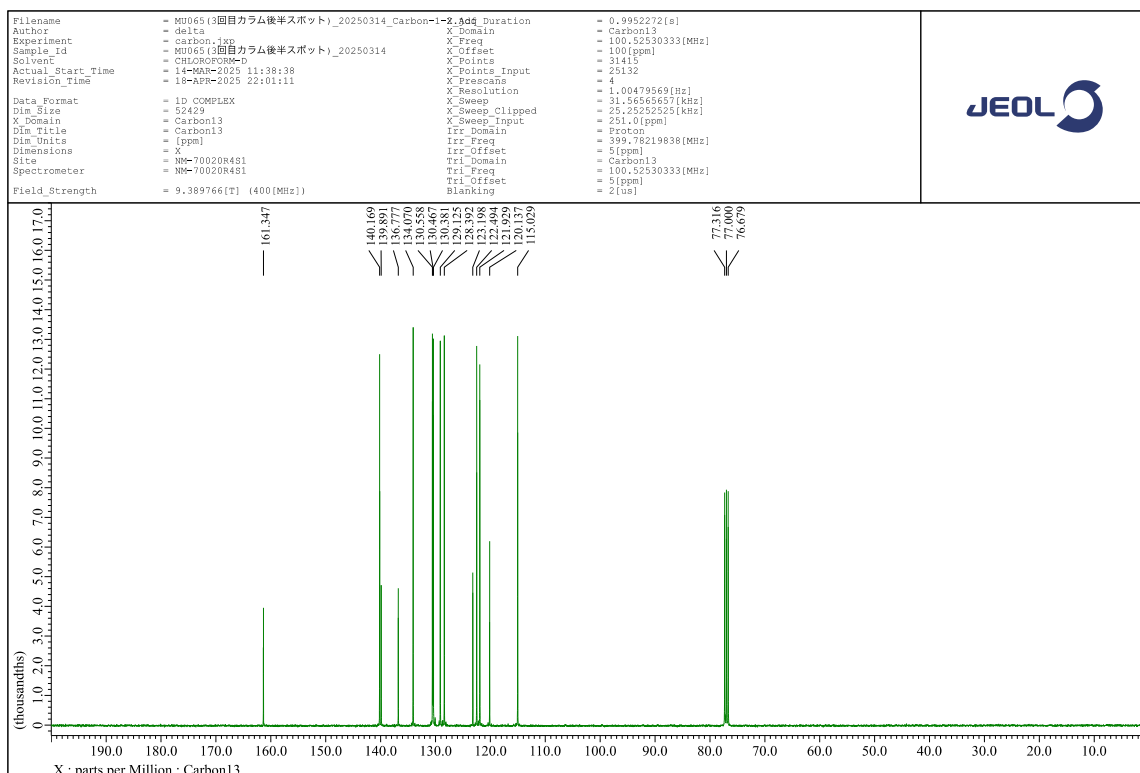



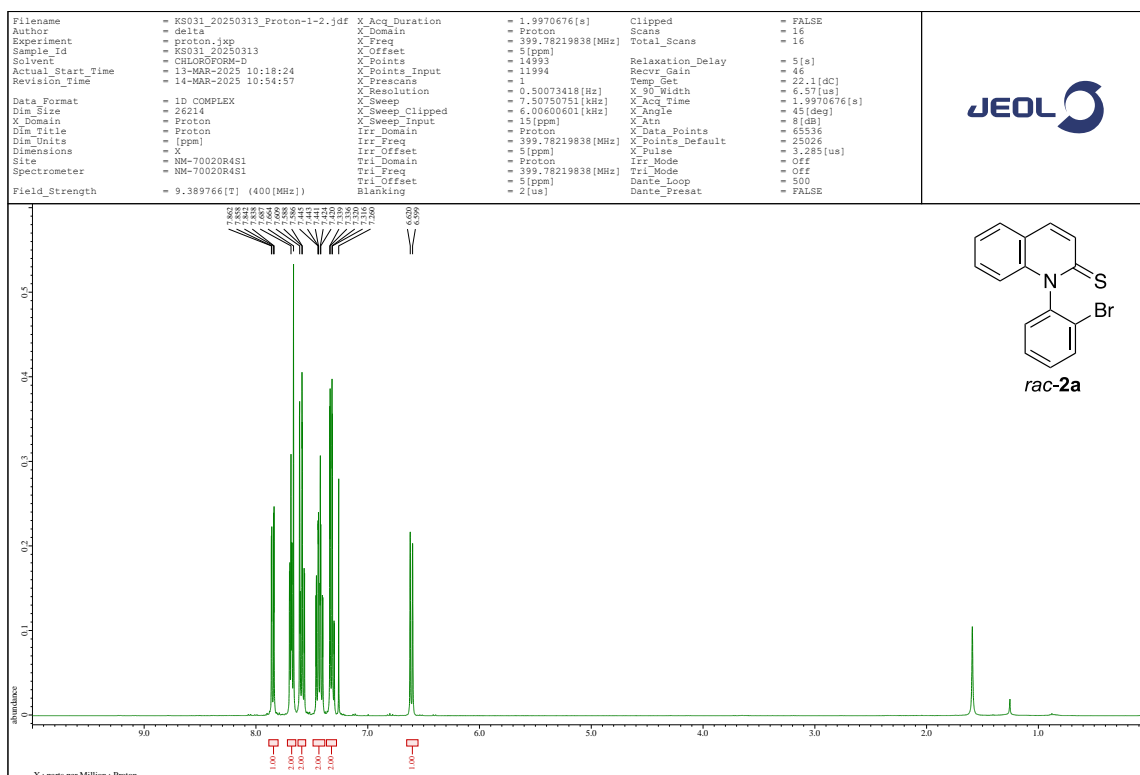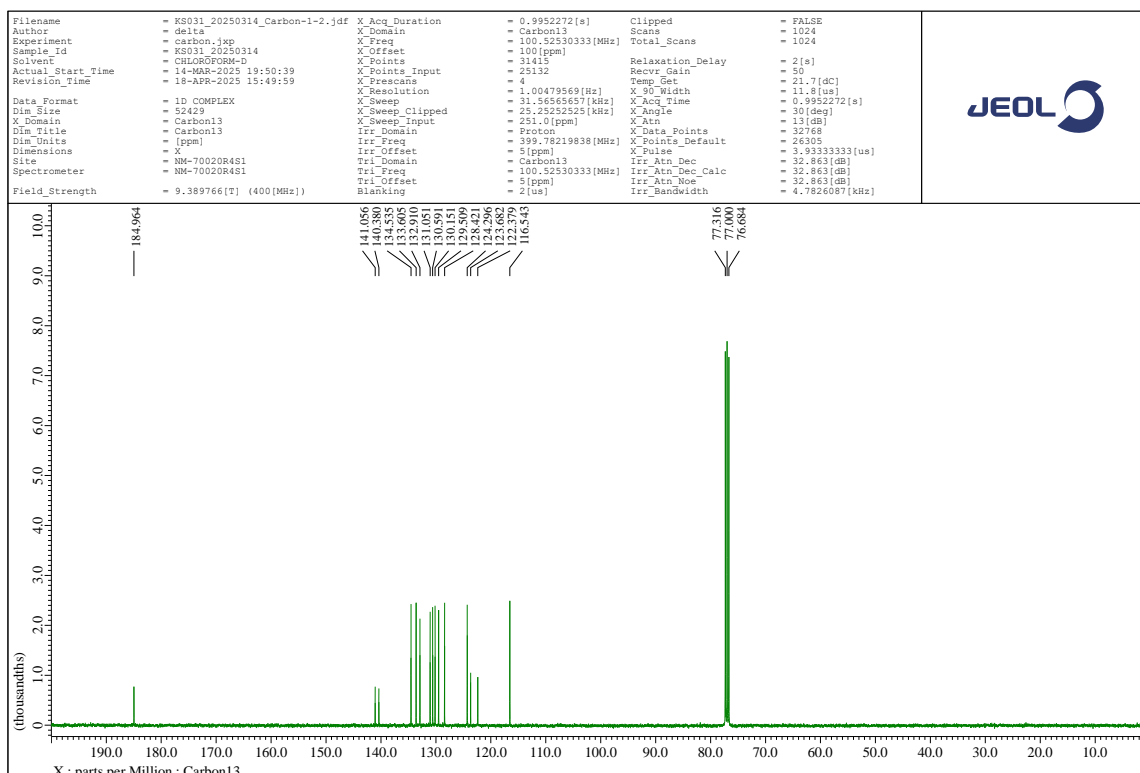

## Chiral MPLC and HPLC charts of compounds 1a,b and 2a

### Enantiomer separation through MPLC using a semi-preparative chiral IH column

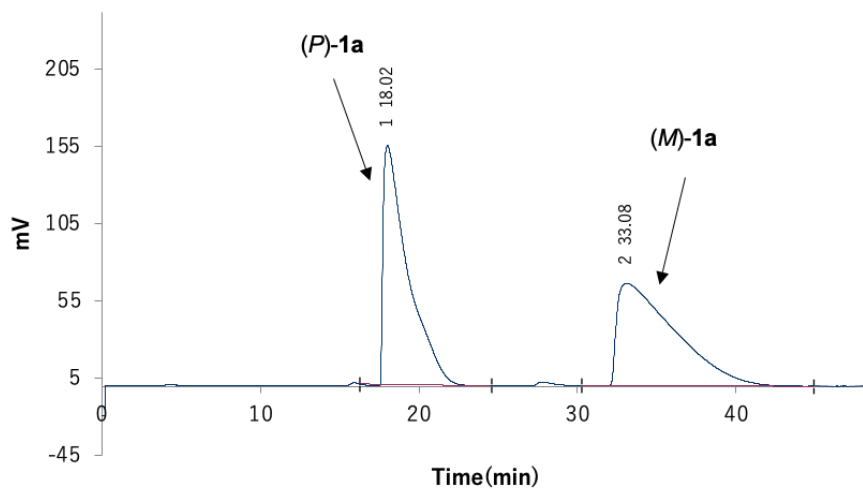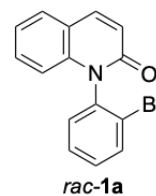

IH  
eluent: 15% IPA in hexane  
flow rate: 20 × 0.2 mL/min

| No. | Rt    | Area     | Area(%) | Height |
|-----|-------|----------|---------|--------|
| 1   | 18.02 | 16557699 | 49.5335 | 154433 |
| 2   | 33.08 | 16869591 | 50.4665 | 66430  |
|     |       | 33427290 | 100     | 220863 |

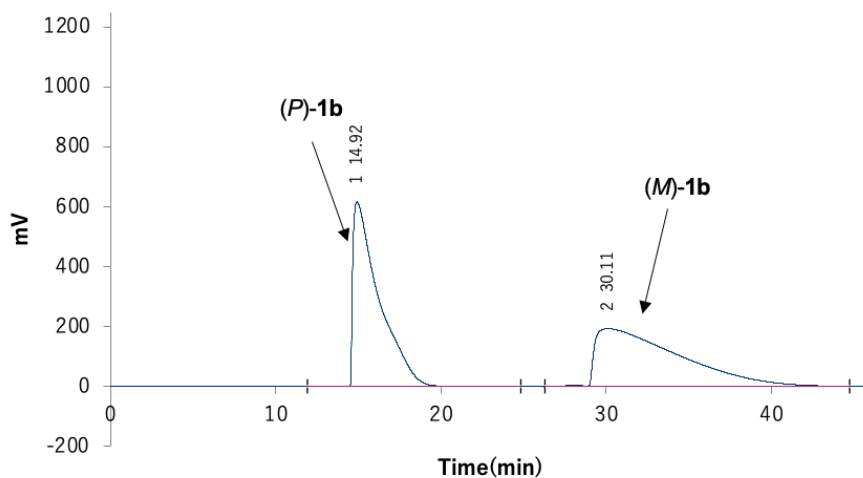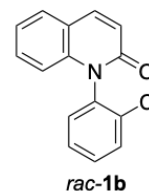

IH  
eluent: 15% IPA in hexane  
flow rate: 20 × 0.2 mL/min

| No. | Rt    | Area     | Area(%) | Height |
|-----|-------|----------|---------|--------|
| 1   | 14.92 | 67191427 | 49.7992 | 615786 |
| 2   | 30.11 | 67733376 | 50.2008 | 192323 |
|     |       | 1.35E+08 | 100     | 808109 |

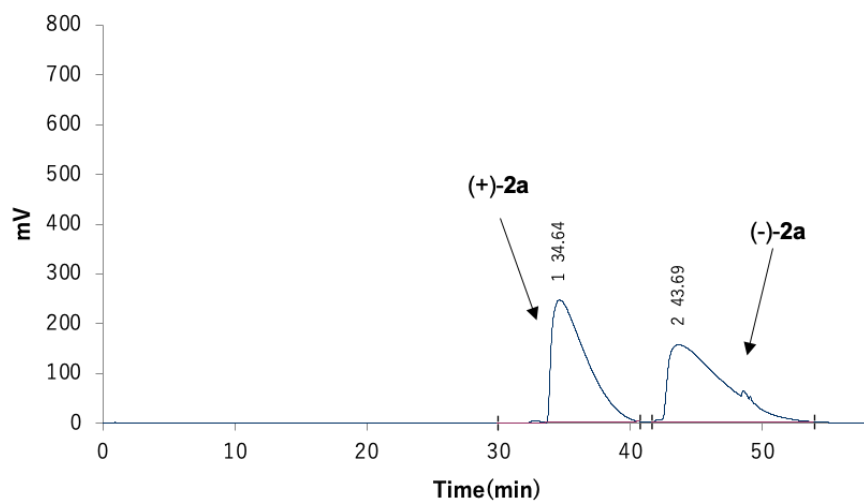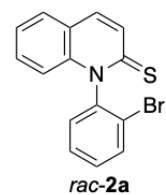

IH  
eluent: 5% IPA in hexane  
flow rate: 20 × 0.2 mL/min

| No. | Rt    | Area     | Area(%) | Height |
|-----|-------|----------|---------|--------|
| 1   | 34.64 | 44231636 | 49.7262 | 245539 |
| 2   | 43.69 | 44718717 | 50.2738 | 155483 |
|     |       | 88950353 | 100     | 401022 |

## HPLC analysis using a chiral column for the determination of ee

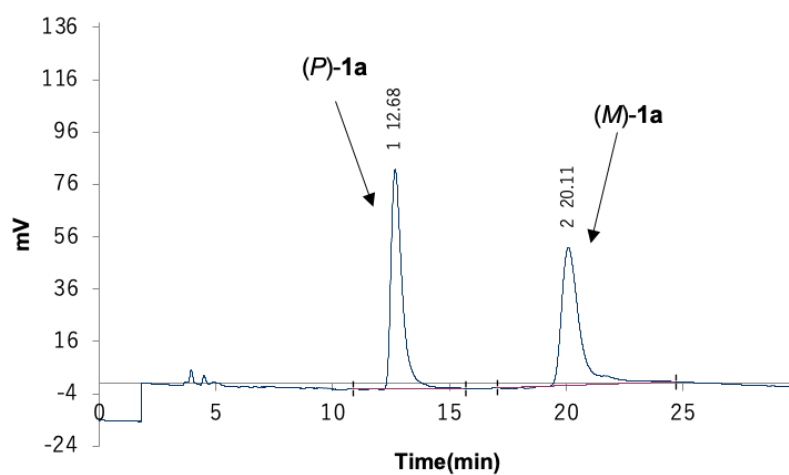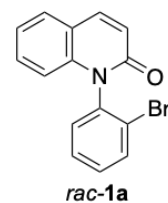

AD-H  
eluent: 15% IPA in hexane  
flow rate: 0.8 mL/min

| No. | Rt    | Area    | Area(%) | Height |
|-----|-------|---------|---------|--------|
| 1   | 12.68 | 2769672 | 49.6187 | 83757  |
| 2   | 20.11 | 2812238 | 50.3813 | 52657  |
|     |       | 5581910 | 100     | 136414 |

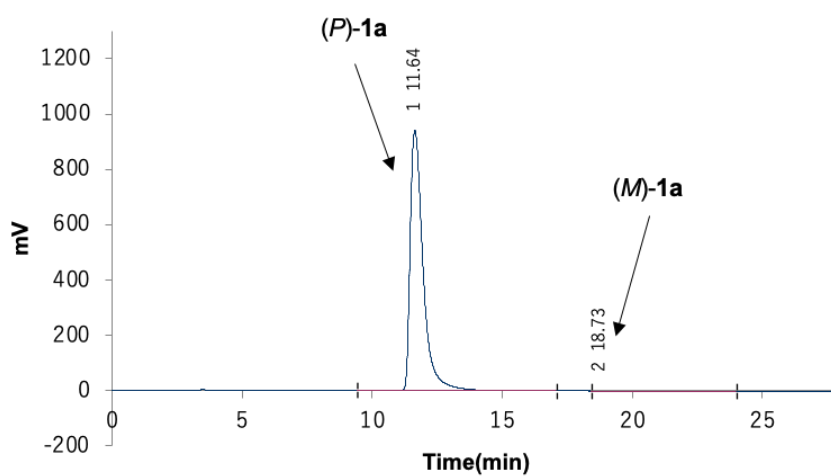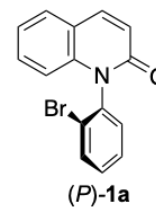

AD-H  
eluent: 15% IPA in hexane  
flow rate: 0.8 mL/min

| No. | Rt    | Area     | Area(%) | Height |
|-----|-------|----------|---------|--------|
| 1   | 11.64 | 32319038 | 99.8511 | 941725 |
| 2   | 18.73 | 48207.2  | 0.1489  | 86     |
|     |       | 32367245 | 100     | 941811 |

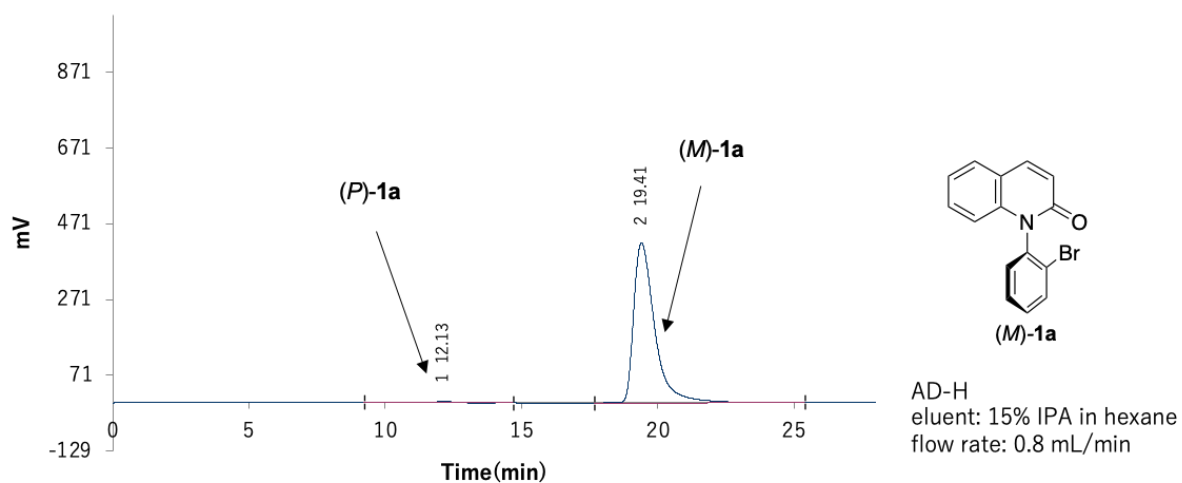

| No. | Rt    | Area     | Area(%) | Height |
|-----|-------|----------|---------|--------|
| 1   | 12.13 | 78018.2  | 0.341   | 4961   |
| 2   | 19.41 | 22803947 | 99.659  | 422652 |
|     |       | 22881965 | 100     | 427613 |



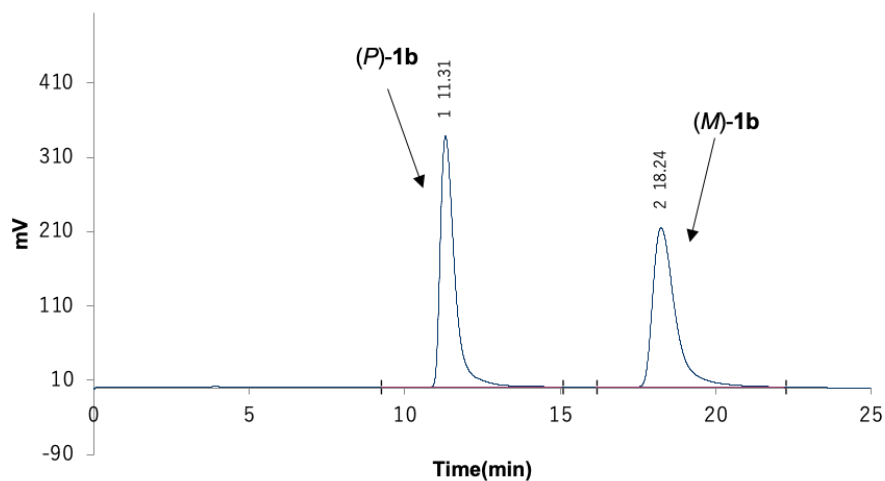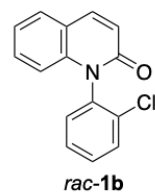

AD-H  
eluent: 15% IPA in hexane  
flow rate: 0.8 mL/min

| No. | Rt    | Area     | Area(%) | Height |
|-----|-------|----------|---------|--------|
| 1   | 11.31 | 10815213 | 50.0329 | 337776 |
| 2   | 18.24 | 10800974 | 49.9671 | 214668 |
|     |       | 21616186 | 100     | 552444 |

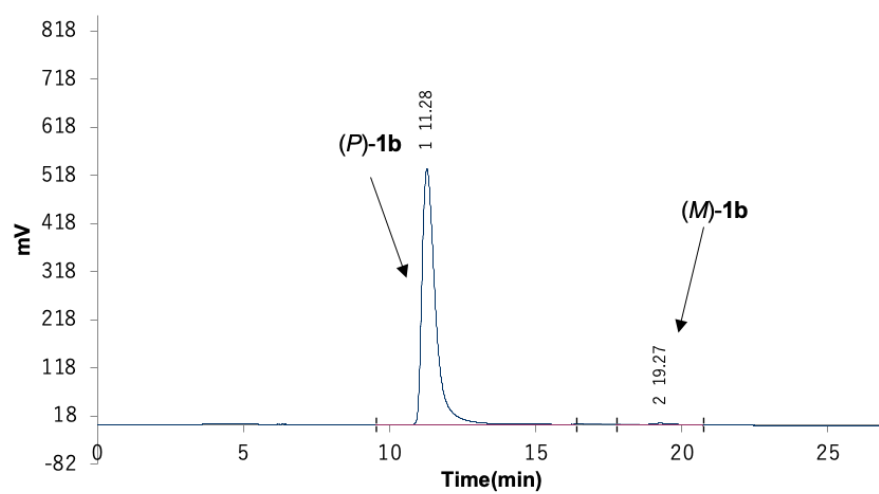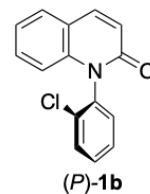

AD-H  
eluent: 15% IPA in hexane  
flow rate: 0.8 mL/min

| No. | Rt    | Area     | Area(%) | Height |
|-----|-------|----------|---------|--------|
| 1   | 11.28 | 16876141 | 99.045  | 531326 |
| 2   | 19.27 | 162719.4 | 0.955   | 3151   |
|     |       | 17038860 | 100     | 534477 |

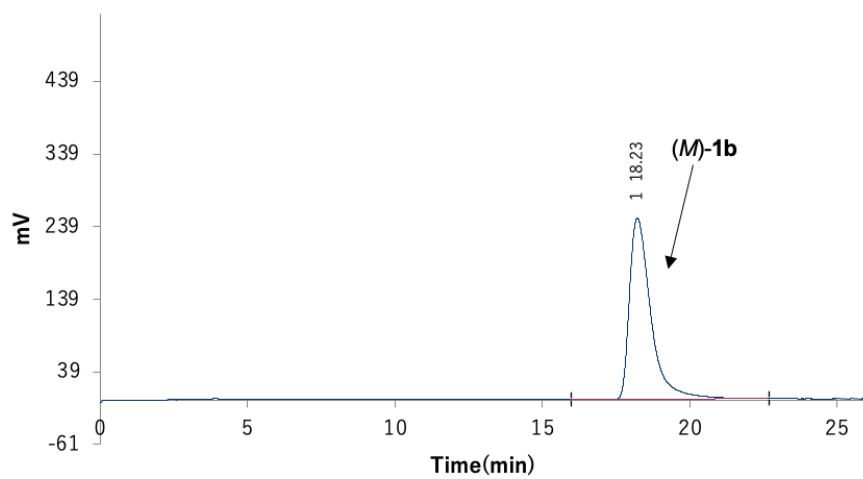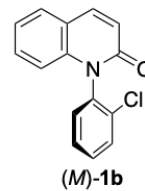

AD-H  
 eluent: 15% IPA in hexane  
 flow rate: 0.8 mL/min

| No. | Rt    | Area     | Area(%) | Height |
|-----|-------|----------|---------|--------|
| 1   | 18.23 | 12517220 | 100     | 249364 |
|     |       | 12517220 | 100     | 249364 |

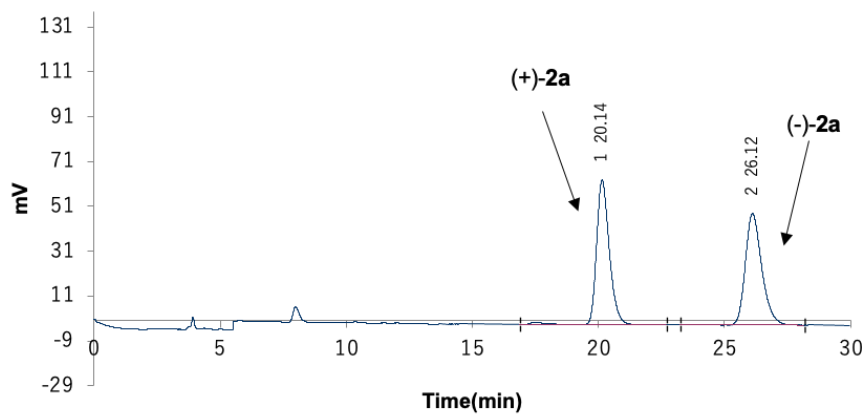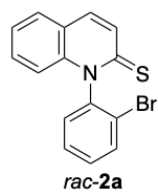

AS-H  
eluent: 15% IPA in hexane  
flow rate: 0.8 mL/min

| No. | Rt    | Area      | Area(%) | Height |
|-----|-------|-----------|---------|--------|
| 1   | 20.14 | 2279662.6 | 50.594  | 64540  |
| 2   | 26.12 | 2226131.5 | 49.406  | 49610  |
|     |       | 4505794.1 | 100     | 114150 |

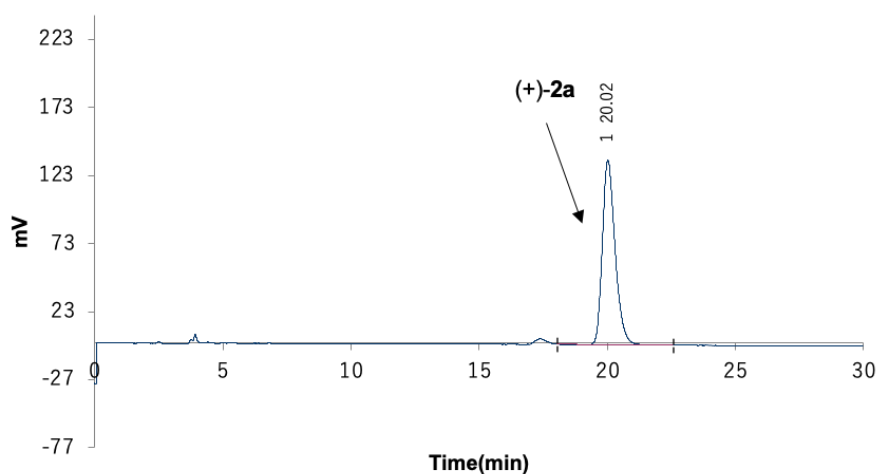

**(+)-2a**

AS-H  
eluent: 15% IPA in hexane  
flow rate: 0.8 mL/min

| No. | Rt    | Area    | Area(%) | Height |
|-----|-------|---------|---------|--------|
| 1   | 20.02 | 4655608 | 100     | 135501 |
|     |       | 4655608 | 100     | 135501 |

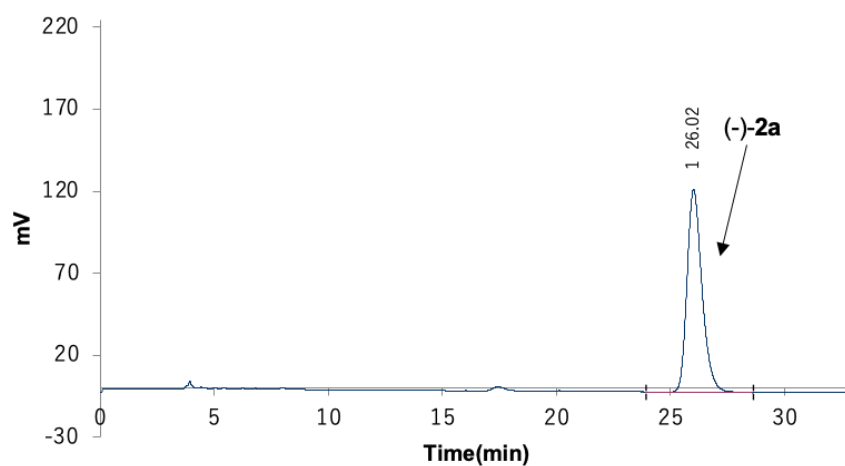

**(-)-2a**

AS-H  
 eluent: 15% IPA in hexane  
 flow rate: 0.8 mL/min

| No. | Rt    | Area    | Area(%) | Height |
|-----|-------|---------|---------|--------|
| 1   | 26.02 | 5603254 | 100     | 123532 |
|     |       | 5603254 | 100     | 123532 |

## Evaluation of rotational barriers of compounds **1a** and **1b**

(Evaluation of rotational barrier of **1a** at 116 °C in 1,2-dichloroethane)

| Time (s) | less polar(%) | more polar(%) | % ee |
|----------|---------------|---------------|------|
| 0        | 98.79         | 1.21          | 97.6 |
| 3600     | 95.37         | 4.63          | 90.7 |
| 7200     | 92.99         | 7.01          | 86.0 |
| 18000    | 85.35         | 14.65         | 70.7 |
| 37800    | 77.55         | 22.45         | 55.1 |
| 59400    | 66.61         | 33.39         | 33.2 |
| 72000    | 63.02         | 36.98         | 26.0 |
| 86400    | 60.39         | 39.61         | 20.8 |
| 111600   | 56.35         | 43.64         | 12.7 |
| 140400   | 53.91         | 46.09         | 7.8  |
| 154800   | 53.39         | 46.61         | 6.8  |
| 183600   | 53.37         | 46.63         | 6.7  |

| Temp (°C) | T (K)  | k (s <sup>-1</sup> ) | $\Delta G^\ddagger$ (kcal/mol) |
|-----------|--------|----------------------|--------------------------------|
| 116       | 389.15 | 8                    | 32.0                           |

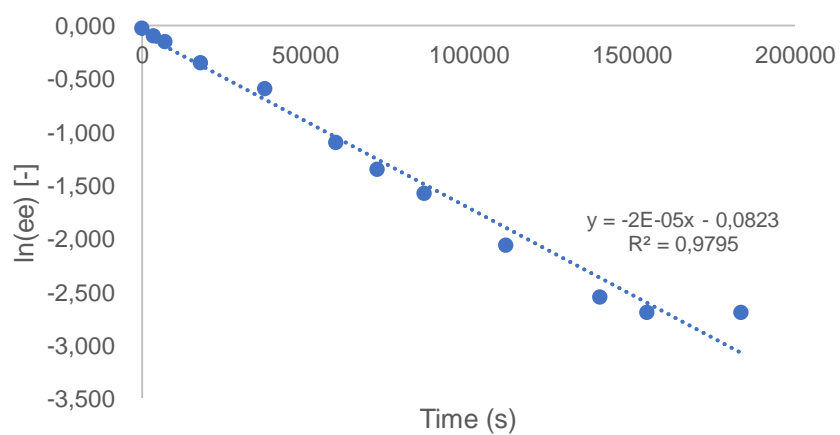

(Evaluation of rotational barrier of **1b** at 96 °C in 1,2-dichloroethane)

| Time [s] | less polar(%) | more polar(%) | % ee |
|----------|---------------|---------------|------|
| 0        | 100           | 0             | 100  |
| 1800     | 99.06         | 0.94          | 98.1 |
| 3600     | 98.54         | 1.46          | 97.1 |
| 5400     | 97.75         | 2.25          | 95.5 |
| 7200     | 97.16         | 2.84          | 94.3 |
| 10800    | 95.73         | 4.27          | 91.5 |
| 21600    | 91.85         | 8.15          | 83.7 |
| 39600    | 83.81         | 16.19         | 67.6 |
| 54000    | 81.48         | 18.52         | 63   |
| 82800    | 73.66         | 26.34         | 47.3 |
| 147600   | 63.73         | 36.27         | 27.4 |

| Temp (°C) | T (K)  | k (s <sup>-1</sup> ) | $\Delta G^\ddagger$ (kcal/mol) |
|-----------|--------|----------------------|--------------------------------|
| 96        | 369.15 | 8                    | 30.8                           |

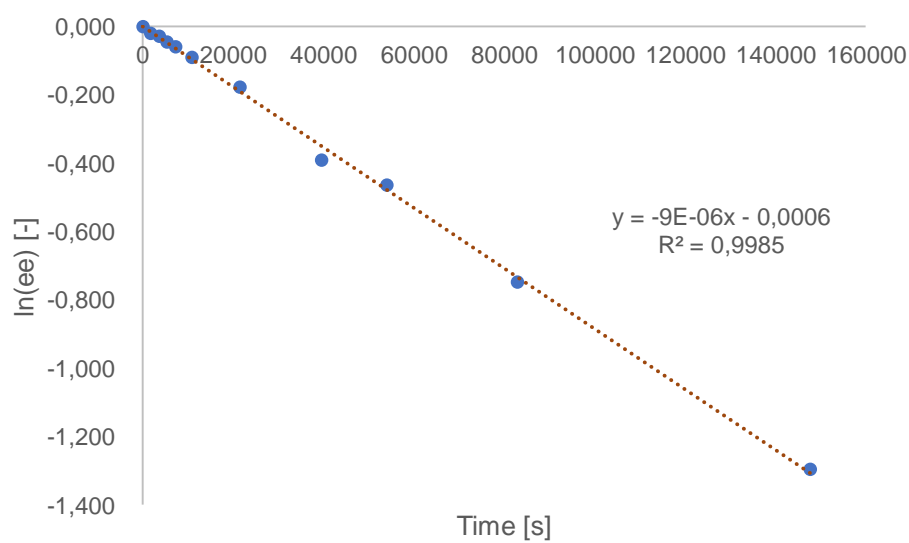

## X-ray crystal data of *rac*-1a,b, (*P*)-1a,b, *rac*-2a (check CIF)

### checkCIF/PLATON report

#### *rac*-1a

Structure factors have been supplied for datablock(s) TS221024A2-4\_a

THIS REPORT IS FOR GUIDANCE ONLY. IF USED AS PART OF A REVIEW PROCEDURE FOR PUBLICATION, IT SHOULD NOT REPLACE THE EXPERTISE OF AN EXPERIENCED CRYSTALLOGRAPHIC REFEREE.

No syntax errors found.      CIF dictionary      Interpreting this report

#### Datablock: TS221024A2-4\_a

---

|                 |                |                    |              |
|-----------------|----------------|--------------------|--------------|
| Bond precision: | C-C = 0.0101 Å | Wavelength=0.71073 |              |
| Cell:           | a=16.488(2)    | b=39.310(6)        | c=7.5814(12) |
|                 | alpha=90       | beta=90            | gamma=90     |
| Temperature:    | 100 K          |                    |              |
|                 | Calculated     | Reported           |              |
| Volume          | 4913.8(12)     | 4913.8(13)         |              |
| Space group     | F d d 2        | F d d 2            |              |
| Hall group      | F 2 -2d        | F 2 -2d            |              |
| Moiety formula  | C15 H10 Br N O | C15 H10 Br N O     |              |
| Sum formula     | C15 H10 Br N O | C15 H10 Br N O     |              |
| Mr              | 300.14         | 300.15             |              |
| Dx,g cm-3       | 1.623          | 1.623              |              |
| Z               | 16             | 16                 |              |
| Mu (mm-1)       | 3.331          | 3.331              |              |
| F000            | 2400.0         | 2400.0             |              |
| F000'           | 2396.35        |                    |              |
| h,k,lmax        | 19,46,9        | 19,46,9            |              |
| Nref            | 2165[ 1172]    | 2157               |              |
| Tmin,Tmax       | 0.586,0.808    | 0.690,0.810        |              |
| Tmin'           | 0.468          |                    |              |

Correction method= # Reported T Limits: Tmin=0.690 Tmax=0.810  
AbsCorr = MULTI-SCAN

Data completeness= 1.84/1.00      Theta(max)= 25.018

R(reflections)= 0.0367( 2032)      wR2(reflections)=  
0.0863( 2157)

S = 1.084      Npar= 163

---

The following ALERTS were generated. Each ALERT has the format

**test-name\_ALERT\_alert-type\_alert-level.**

Click on the hyperlinks for more details of the test.

---

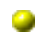

#### Alert level C

|                                                                   |         |              |
|-------------------------------------------------------------------|---------|--------------|
| PLAT090_ALERT_3_C Poor Data / Parameter Ratio (Zmax > 18) .....   | 7.18    | Note         |
| PLAT213_ALERT_2_C Atom C15 has ADP max/min Ratio .....            | 3.9     | prolat       |
| PLAT341_ALERT_3_C Low Bond Precision on C-C Bonds .....           | 0.01007 | Ang.         |
| PLAT927_ALERT_1_C Reported and Calculated wR2 Differ by .....     | 0.0012  | Check        |
| PLAT987_ALERT_1_C The Flack x is >> 0 - Do a BASF/TWIN Refinement |         | Please Check |

---

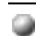

#### Alert level G

|                                                                    |                                                           |              |
|--------------------------------------------------------------------|-----------------------------------------------------------|--------------|
| PLAT083_ALERT_2_G SHELXL Second Parameter in WGHT Unusually Large  | 35.95                                                     | Why ?        |
| PLAT432_ALERT_2_G Short Inter X...Y Contact Br1 ..C6               |                                                           | 3.30 Ang.    |
|                                                                    | x,y,-1+z =                                                | 1_554 Check  |
| PLAT883_ALERT_1_G Absent Datum for _atom_sites_solution_primary .. |                                                           | Please Do !  |
| PLAT899_ALERT_4_G SHELXL2018 is Outdated and Succeeded by SHELXL   | 2019/3                                                    | Note         |
| PLAT909_ALERT_3_G Percentage of I>2sig(I) Data at Theta(Max) Still | 85%                                                       | Note         |
| PLAT910_ALERT_3_G Missing # of FCF Reflection(s) Below Theta(Min). |                                                           | 1 Note       |
|                                                                    | 0 4 0,                                                    |              |
| PLAT965_ALERT_2_G The SHELXL WEIGHT Optimisation has not Converged |                                                           | Please Check |
| PLAT969_ALERT_5_G The 'Henn et al.' R-Factor-gap value .....       | 1.394                                                     | Note         |
|                                                                    | Predicted wR2: Based on SigI**2 6.19 or SHELX Weight 7.96 |              |
| PLAT978_ALERT_2_G Number C-C Bonds with Positive Residual Density. |                                                           | 1 Info       |

---

0 **ALERT level A** = Most likely a serious problem - resolve or explain

0 **ALERT level B** = A potentially serious problem, consider carefully

5 **ALERT level C** = Check. Ensure it is not caused by an omission or oversight

9 **ALERT level G** = General information/check it is not something unexpected

|              |   |                                                              |
|--------------|---|--------------------------------------------------------------|
| 3 ALERT type | 1 | CIF construction/syntax error, inconsistent or missing data  |
| 5 ALERT type | 2 | Indicator that the structure model may be wrong or deficient |
| 4 ALERT type | 3 | Indicator that the structure quality may be low              |
| 1 ALERT type | 4 | Improvement, methodology, query or suggestion                |
| 1 ALERT type | 5 | Informative message, check                                   |

---



It is advisable to attempt to resolve as many as possible of the alerts in all categories. Often the minor alerts point to easily fixed oversights, errors and omissions in your CIF or refinement strategy, so attention to these fine details can be worthwhile. In order to resolve some of the more serious problems it may be necessary to carry out additional measurements or structure refinements. However, the purpose of your study may justify the reported deviations and the more serious of these should normally be commented upon in the discussion or experimental section of a paper or in the "special\_details" fields of the CIF. checkCIF was carefully designed to identify outliers and unusual parameters, but every test has its limitations and alerts that are not important in a particular case may appear. Conversely, the absence of alerts does not guarantee there are no aspects of the results needing attention. It is up to the individual to critically assess their own results and, if necessary, seek expert advice.

### **Publication of your CIF in IUCr journals**

A basic structural check has been run on your CIF. These basic checks will be run on all CIFs submitted for publication in IUCr journals (*Acta Crystallographica*, *Journal of Applied Crystallography*, *Journal of Synchrotron Radiation*); however, if you intend to submit to *Acta Crystallographica Section C* or *E* or *IUCrData*, you should make sure that full publication checks are run on the final version of your CIF prior to submission.

### **Publication of your CIF in other journals**

Please refer to the *Notes for Authors* of the relevant journal for any special instructions relating to CIF submission.

---

**PLATON version of 02/02/2025; check.def file version of 02/02/2025**

**Datablock TS221024A2-4\_a - ellipsoid plot**

ORTEP drawing of ***rac-1a*** showing thermal ellipsoids at the 50% probability level.

Single colorless crystals of ***rac-1a*** were obtained by vapour diffusion of hexane into a methanol solution of the compound at room temperature.

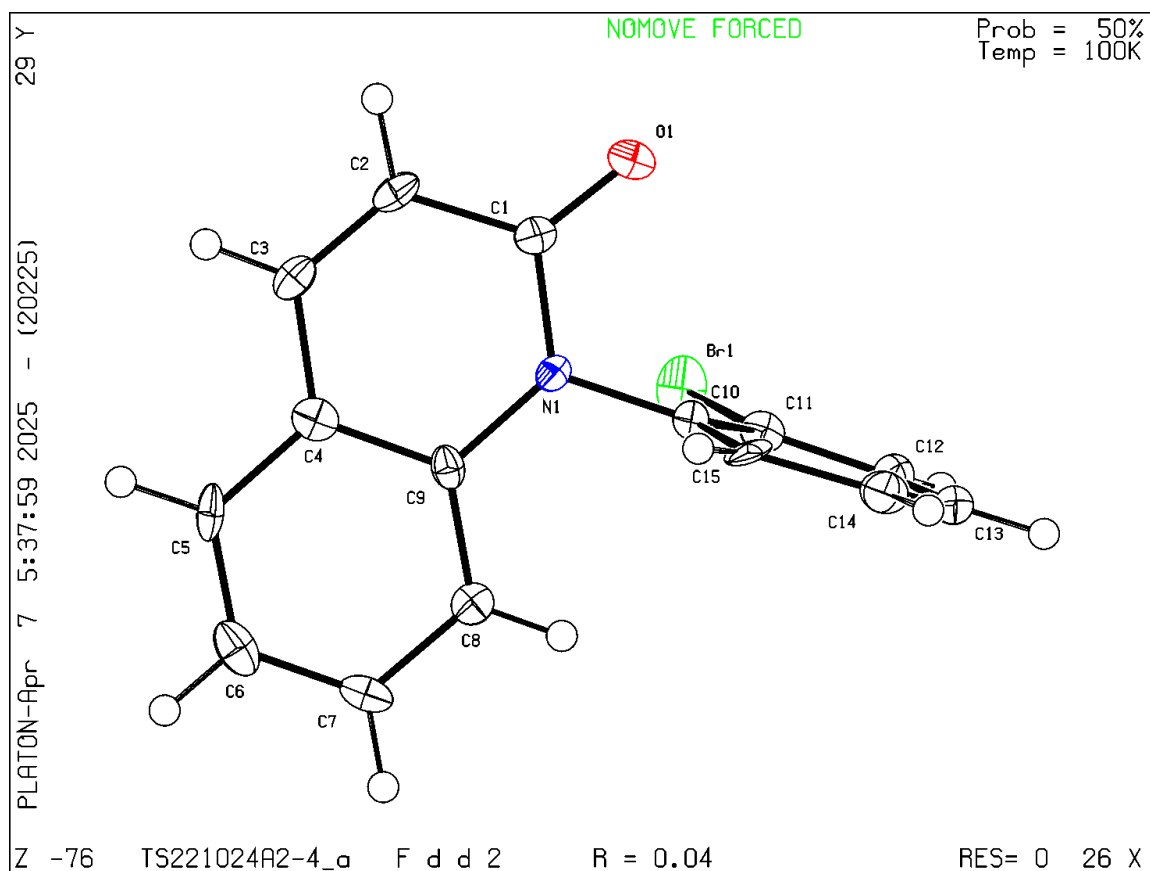

## checkCIF/PLATON report

### (P)-1a

Structure factors have been supplied for datablock(s) TS2211025B\_0m\_a

THIS REPORT IS FOR GUIDANCE ONLY. IF USED AS PART OF A REVIEW PROCEDURE FOR PUBLICATION, IT SHOULD NOT REPLACE THE EXPERTISE OF AN EXPERIENCED CRYSTALLOGRAPHIC REFEREE.

No syntax errors found.      CIF dictionary      Interpreting this report

### Datablock: TS2211025B\_0m\_a

---

|                 |                |                    |              |
|-----------------|----------------|--------------------|--------------|
| Bond precision: | C-C = 0.0033 Å | Wavelength=0.71073 |              |
| Cell:           | a=7.2074(2)    | b=7.7877(3)        | c=22.6279(6) |
|                 | alpha=90       | beta=90            | gamma=90     |
| Temperature:    | 100 K          |                    |              |

|                        | Calculated     | Reported       |
|------------------------|----------------|----------------|
| Volume                 | 1270.08(7)     | 1270.08(7)     |
| Space group            | P 21 21 21     | P 21 21 21     |
| Hall group             | P 2ac 2ab      | P 2ac 2ab      |
| Moiety formula         | C15 H10 Br N O | C15 H10 Br N O |
| Sum formula            | C15 H10 Br N O | C15 H10 Br N O |
| Mr                     | 300.14         | 300.15         |
| Dx, g cm <sup>-3</sup> | 1.570          | 1.570          |
| Z                      | 4              | 4              |
| Mu (mm <sup>-1</sup> ) | 3.222          | 3.222          |
| F000                   | 600.0          | 600.0          |
| F000'                  | 599.09         |                |
| h,k,lmax               | 8,9,26         | 8,9,26         |
| Nref                   | 2261 [ 1340]   | 2256           |
| Tmin,Tmax              | 0.569,0.660    | 0.620,0.680    |
| Tmin'                  | 0.558          |                |

Correction method= # Reported T Limits: Tmin=0.620 Tmax=0.680

AbsCorr = MULTI-SCAN

Data completeness= 1.68/1.00

Theta(max)= 25.002

R(reflections)= 0.0166( 2210)

wR2(reflections)=

0.0376( 2256)

S = 1.052

Npar= 163

---

The following ALERTS were generated. Each ALERT has the format

**test-name\_ALERT\_alert-type\_alert-level.**

Click on the hyperlinks for more details of the test.

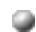

**Alert level G**

|                                                                              |        |      |
|------------------------------------------------------------------------------|--------|------|
| PLAT883_ALERT_1_G Absent Datum for _atom_sites_solution_primary ..           | Please | Do ! |
| PLAT899_ALERT_4_G SHELXL2018 is Outdated and Succeeded by SHELXL             | 2019/3 | Note |
| PLAT909_ALERT_3_G Percentage of I>2sig(I) Data at Theta(Max) Still           | 94%    | Note |
| PLAT910_ALERT_3_G Missing # of FCF Reflection(s) Below Theta(Min).<br>0 0 2, | 1      | Note |
| PLAT969_ALERT_5_G The 'Henn et al.' R-Factor-gap value .....                 | 1.117  | Note |
| Predicted wR2: Based on SigI**2 3.36 or SHELX Weight                         | 3.57   |      |
| PLAT978_ALERT_2_G Number C-C Bonds with Positive Residual Density.           | 9      | Info |

---

0 **ALERT level A** = Most likely a serious problem - resolve or explain

0 **ALERT level B** = A potentially serious problem, consider carefully

0 **ALERT level C** = Check. Ensure it is not caused by an omission or oversight

6 **ALERT level G** = General information/check it is not something unexpected

- |              |                                                                |
|--------------|----------------------------------------------------------------|
| 1 ALERT type | 1 CIF construction/syntax error, inconsistent or missing data  |
| 1 ALERT type | 2 Indicator that the structure model may be wrong or deficient |
| 2 ALERT type | 3 Indicator that the structure quality may be low              |
| 1 ALERT type | 4 Improvement, methodology, query or suggestion                |
| 1 ALERT type | 5 Informative message, check                                   |
- 
-

It is advisable to attempt to resolve as many as possible of the alerts in all categories. Often the minor alerts point to easily fixed oversights, errors and omissions in your CIF or refinement strategy, so attention to these fine details can be worthwhile. In order to resolve some of the more serious problems it may be necessary to carry out additional measurements or structure refinements. However, the purpose of your study may justify the reported deviations and the more serious of these should normally be commented upon in the discussion or experimental section of a paper or in the "special\_details" fields of the CIF. checkCIF was carefully designed to identify outliers and unusual parameters, but every test has its limitations and alerts that are not important in a particular case may appear. Conversely, the absence of alerts does not guarantee there are no aspects of the results needing attention. It is up to the individual to critically assess their own results and, if necessary, seek expert advice.

### **Publication of your CIF in IUCr journals**

A basic structural check has been run on your CIF. These basic checks will be run on all CIFs submitted for publication in IUCr journals (*Acta Crystallographica*, *Journal of Applied Crystallography*, *Journal of Synchrotron Radiation*); however, if you intend to submit to *Acta Crystallographica Section C* or *E* or *IUCrData*, you should make sure that full publication checks are run on the final version of your CIF prior to submission.

### **Publication of your CIF in other journals**

Please refer to the *Notes for Authors* of the relevant journal for any special instructions relating to CIF submission.

---

**PLATON version of 02/02/2025; check.def file version of 02/02/2025**

**Datablock TS2211025B\_0m\_a - ellipsoid plot**

ORTEP drawing of (*P*)-**1a** showing thermal ellipsoids at the 50% probability level.

Single colorless crystals of (*P*)-**1a** were obtained by vapour diffusion of hexane into a methanol solution of the compound at room temperature.

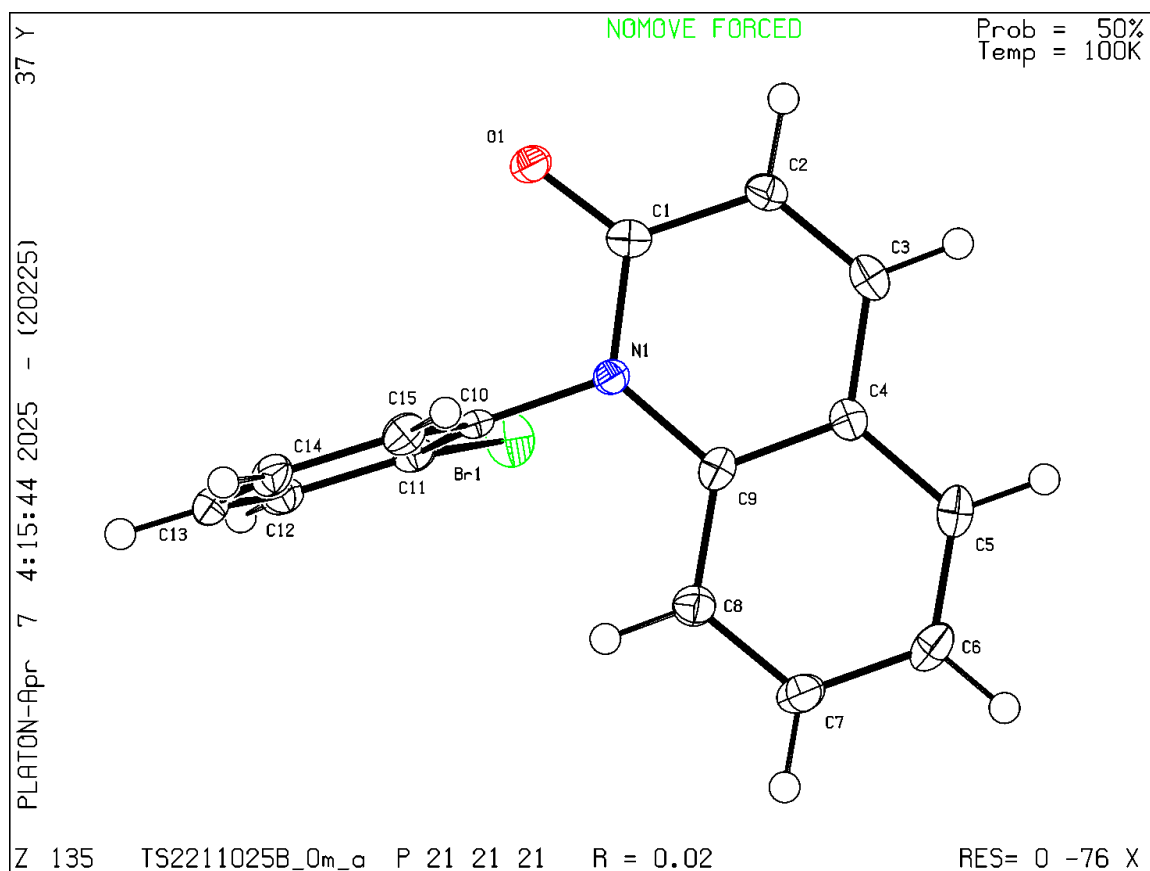

## checkCIF/PLATON report

### *rac-1b*

You have not supplied any structure factors. As a result the full set of tests cannot be run.

THIS REPORT IS FOR GUIDANCE ONLY. IF USED AS PART OF A REVIEW PROCEDURE FOR PUBLICATION, IT SHOULD NOT REPLACE THE EXPERTISE OF AN EXPERIENCED CRYSTALLOGRAPHIC REFEREE.

No syntax errors found.      CIF dictionary      Interpreting this report

### Datablock: mu230926b\_kk\_a

---

|                 |                           |                        |                         |
|-----------------|---------------------------|------------------------|-------------------------|
| Bond precision: | C-C = 0.0059 Å            | Wavelength=0.71073     |                         |
| Cell:           | a=16.4270(18)<br>alpha=90 | b=39.005(4)<br>beta=90 | c=7.4785(9)<br>gamma=90 |
| Temperature:    | 100 K                     |                        |                         |
|                 | Calculated                | Reported               |                         |
| Volume          | 4791.7(9)                 | 4791.7(9)              |                         |
| Space group     | F d d 2                   | F d d 2                |                         |
| Hall group      | F 2 -2d                   | F 2 -2d                |                         |
| Moiety formula  | C15 H10 Cl N O            | C15 H10 Cl N O         |                         |
| Sum formula     | C15 H10 Cl N O            | C15 H10 Cl N O         |                         |
| Mr              | 255.69                    | 255.69                 |                         |
| Dx,g cm-3       | 1.418                     | 1.418                  |                         |
| Z               | 16                        | 16                     |                         |
| Mu (mm-1)       | 0.303                     | 0.303                  |                         |
| F000            | 2112.0                    | 2112.0                 |                         |
| F000'           | 2115.15                   |                        |                         |
| h,k,lmax        | 19,46,8                   | 19,46,8                |                         |
| Nref            | 2126[ 1152]               | 1919                   |                         |
| Tmin,Tmax       | 0.913,0.953               | 0.770,0.950            |                         |
| Tmin'           | 0.877                     |                        |                         |

Correction method= # Reported T Limits: Tmin=0.770 Tmax=0.950

AbsCorr = MULTI-SCAN

Data completeness= 1.67/0.90

Theta(max)= 25.021

R(reflections)= 0.0412( 1826)

wR2(reflections)=

0.1324( 1919)

S = 1.132

Npar= 163

---

The following ALERTS were generated. Each ALERT has the format

**test-name\_ALERT\_alert-type\_alert-level.**

Click on the hyperlinks for more details of the test.

---

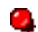

**Alert level A**

PLAT029\_ALERT\_3\_A\_diffn\_measured\_fraction\_theta\_full value Low.

0.924 Why?

**Author Response: The completeness was reduced because reflections from an additional crystal overlapped with low-angle reflections.**

---

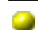

**Alert level C**

ABSTY02\_ALERT\_1\_C An \_exptl\_absorpt\_correction\_type has been given without a literature citation. This should be contained in the \_exptl\_absorpt\_process\_details field.

Absorption correction given as Multi-Scan

PLAT089\_ALERT\_3\_C Poor Data / Parameter Ratio (Zmax < 18) .....

7.07 Note

PLAT340\_ALERT\_3\_C Low Bond Precision on C-C Bonds .....

0.00593 Ang.

---

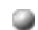

**Alert level G**

PLAT012\_ALERT\_1\_G N.O.K. \_shelx\_res\_checksum Found in CIF .....

Please Check

PLAT883\_ALERT\_1\_G Absent Datum for \_atom\_sites\_solution\_primary ..

Please Do !

PLAT933\_ALERT\_2\_G Number of HKL-OMIT Records in Embedded .res File

4 Note

1 5 1, 3 1 -1, 1 5 -1, 3 1 1,

---

1 **ALERT level A** = Most likely a serious problem - resolve or explain

0 **ALERT level B** = A potentially serious problem, consider carefully

3 **ALERT level C** = Check. Ensure it is not caused by an omission or oversight

3 **ALERT level G** = General information/check it is not something unexpected

3 ALERT type 1 CIF construction/syntax error, inconsistent or missing data

1 ALERT type 2 Indicator that the structure model may be wrong or deficient

3 ALERT type 3 Indicator that the structure quality may be low

0 ALERT type 4 Improvement, methodology, query or suggestion

0 ALERT type 5 Informative message, check

---



It is advisable to attempt to resolve as many as possible of the alerts in all categories. Often the minor alerts point to easily fixed oversights, errors and omissions in your CIF or refinement strategy, so attention to these fine details can be worthwhile. In order to resolve some of the more serious problems it may be necessary to carry out additional measurements or structure refinements. However, the purpose of your study may justify the reported deviations and the more serious of these should normally be commented upon in the discussion or experimental section of a paper or in the "special\_details" fields of the CIF. checkCIF was carefully designed to identify outliers and unusual parameters, but every test has its limitations and alerts that are not important in a particular case may appear. Conversely, the absence of alerts does not guarantee there are no aspects of the results needing attention. It is up to the individual to critically assess their own results and, if necessary, seek expert advice.

### **Publication of your CIF in IUCr journals**

A basic structural check has been run on your CIF. These basic checks will be run on all CIFs submitted for publication in IUCr journals (*Acta Crystallographica*, *Journal of Applied Crystallography*, *Journal of Synchrotron Radiation*); however, if you intend to submit to *Acta Crystallographica Section C* or *E* or *IUCrData*, you should make sure that full publication checks are run on the final version of your CIF prior to submission.

### **Publication of your CIF in other journals**

Please refer to the *Notes for Authors* of the relevant journal for any special instructions relating to CIF submission.

---

**PLATON version of 02/02/2025; check.def file version of 02/02/2025**

**Datablock mu230926b\_kk\_a - ellipsoid plot**

ORTEP drawing of **rac-1b** showing thermal ellipsoids at the 50% probability level.

Single colorless crystals of **rac-1b** were obtained by vapour diffusion of hexane into a methanol solution of the compound at room temperature.

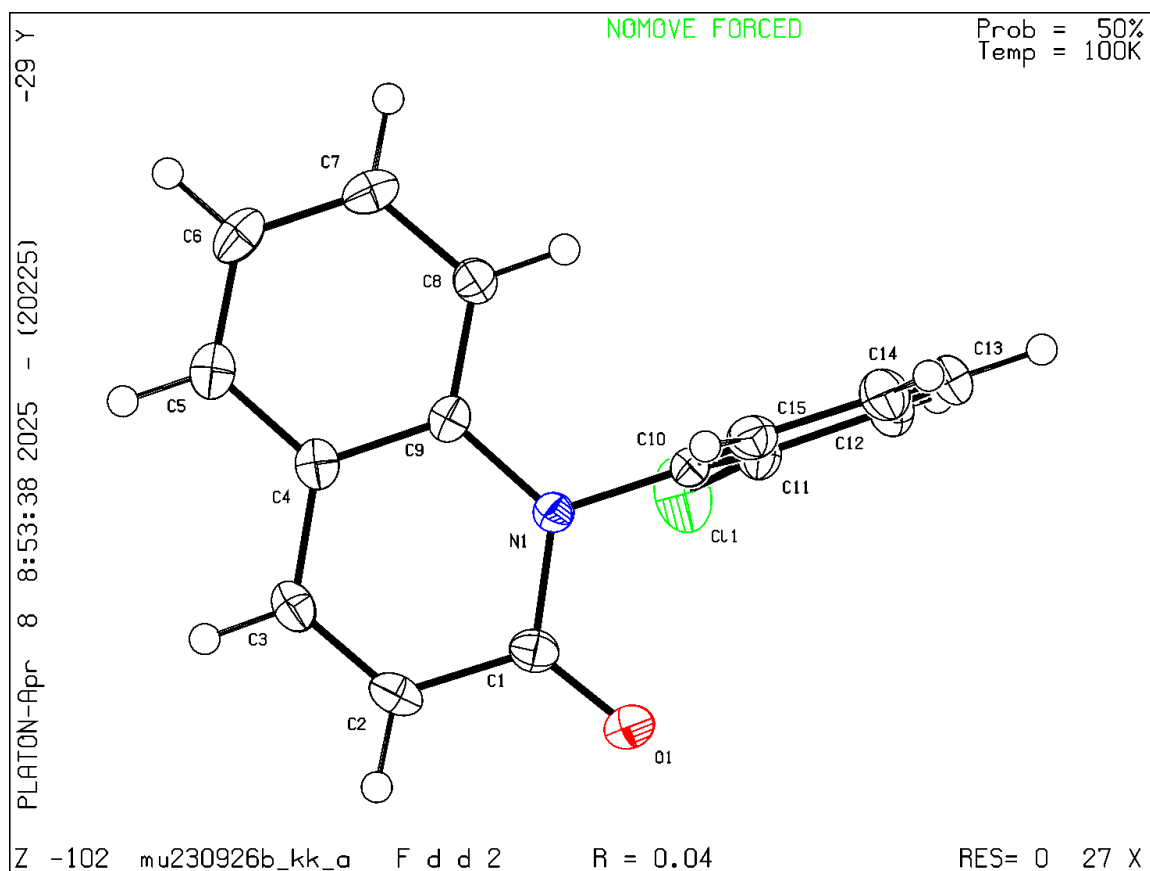

## checkCIF/PLATON report

### (P)-1b

Structure factors have been supplied for datablock(s) mu230926a3\_a

THIS REPORT IS FOR GUIDANCE ONLY. IF USED AS PART OF A REVIEW PROCEDURE FOR PUBLICATION, IT SHOULD NOT REPLACE THE EXPERTISE OF AN EXPERIENCED CRYSTALLOGRAPHIC REFEREE.

No syntax errors found.      CIF dictionary      Interpreting this report

### Datablock: mu230926a3\_a

---

|                        |                          |                         |                         |
|------------------------|--------------------------|-------------------------|-------------------------|
| Bond precision:        | C-C = 0.0030 Å           | Wavelength=0.71073      |                         |
| Cell:                  | a=7.1125(11)<br>alpha=90 | b=7.7261(16)<br>beta=90 | c=22.738(4)<br>gamma=90 |
| Temperature:           | 100 K                    |                         |                         |
|                        | Calculated               | Reported                |                         |
| Volume                 | 1249.5(4)                | 1249.5(4)               |                         |
| Space group            | P 21 21 21               | P 21 21 21              |                         |
| Hall group             | P 2ac 2ab                | P 2ac 2ab               |                         |
| Moiety formula         | C15 H10 Cl N O           | C15 H10 Cl N O          |                         |
| Sum formula            | C15 H10 Cl N O           | C15 H10 Cl N O          |                         |
| Mr                     | 255.69                   | 255.69                  |                         |
| Dx, g cm <sup>-3</sup> | 1.359                    | 1.359                   |                         |
| Z                      | 4                        | 4                       |                         |
| Mu (mm <sup>-1</sup> ) | 0.291                    | 0.291                   |                         |
| F000                   | 528.0                    | 528.0                   |                         |
| F000'                  | 528.79                   |                         |                         |
| h,k,lmax               | 8,9,27                   | 8,9,27                  |                         |
| Nref                   | 2214[ 1315]              | 2205                    |                         |
| Tmin,Tmax              | 0.907,0.926              | 0.790,0.930             |                         |
| Tmin'                  | 0.879                    |                         |                         |

Correction method= # Reported T Limits: Tmin=0.790 Tmax=0.930  
AbsCorr = MULTI-SCAN

Data completeness= 1.68/1.00      Theta(max)= 25.015

R(reflections)= 0.0283( 2186)      wR2(reflections)=  
0.0734( 2205)

S = 1.074      Npar= 163

---

The following ALERTS were generated. Each ALERT has the format

**test-name\_ALERT\_alert-type\_alert-level.**

Click on the hyperlinks for more details of the test.

---



**Alert level C**

|                                                                    |       |          |
|--------------------------------------------------------------------|-------|----------|
| PLAT094_ALERT_2_C Ratio of Maximum / Minimum Residual Density .... | 2.54  | Report   |
| PLAT911_ALERT_3_C Missing FCF Refl Between Thmin & STh/L=          | 0.595 | 3 Report |
| 0 2 0, 1 0 2, 1 1 4,                                               |       |          |

---

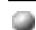

**Alert level G**

|                                                                    |        |       |
|--------------------------------------------------------------------|--------|-------|
| PLAT033_ALERT_4_G Flack x Value Deviates > 3.0 * Sigma from Zero . | 0.150  | Note  |
| PLAT883_ALERT_1_G Absent Datum for _atom_sites_solution_primary .. | Please | Do !  |
| PLAT899_ALERT_4_G SHELXL2018 is Outdated and Succeeded by SHELXL   | 2019/3 | Note  |
| PLAT909_ALERT_3_G Percentage of I>2sig(I) Data at Theta(Max) Still | 97%    | Note  |
| PLAT910_ALERT_3_G Missing # of FCF Reflection(s) Below Theta(Min). | 1      | Note  |
| 0 0 2,                                                             |        |       |
| PLAT913_ALERT_3_G Missing # of Very Strong Reflections in FCF .... | 2      | Note  |
| 0 2 0, 1 0 2,                                                      |        |       |
| PLAT955_ALERT_1_G Reported (CIF) and Actual (FCF) Lmax Differ by . | 1      | Units |
| PLAT969_ALERT_5_G The 'Henn et al.' R-Factor-gap value .....       | 1.923  | Note  |
| Predicted wR2: Based on SigI**2 3.82 or SHELX Weight               | 6.83   |       |
| PLAT978_ALERT_2_G Number C-C Bonds with Positive Residual Density. | 3      | Info  |

---

0 **ALERT level A** = Most likely a serious problem - resolve or explain

0 **ALERT level B** = A potentially serious problem, consider carefully

2 **ALERT level C** = Check. Ensure it is not caused by an omission or oversight

9 **ALERT level G** = General information/check it is not something unexpected

|   |       |        |                                                              |
|---|-------|--------|--------------------------------------------------------------|
| 2 | ALERT | type 1 | CIF construction/syntax error, inconsistent or missing data  |
| 2 | ALERT | type 2 | Indicator that the structure model may be wrong or deficient |
| 4 | ALERT | type 3 | Indicator that the structure quality may be low              |
| 2 | ALERT | type 4 | Improvement, methodology, query or suggestion                |
| 1 | ALERT | type 5 | Informative message, check                                   |

---

It is advisable to attempt to resolve as many as possible of the alerts in all categories. Often the minor alerts point to easily fixed oversights, errors and omissions in your CIF or refinement strategy, so attention to these fine details can be worthwhile. In order to resolve some of the more serious problems it may be necessary to carry out additional measurements or structure refinements. However, the purpose of your study may justify the reported deviations and the more serious of these should normally be commented upon in the discussion or experimental section of a paper or in the "special\_details" fields of the CIF. checkCIF was carefully designed to identify outliers and unusual parameters, but every test has its limitations and alerts that are not important in a particular case may appear. Conversely, the absence of alerts does not guarantee there are no aspects of the results needing attention. It is up to the individual to critically assess their own results and, if necessary, seek expert advice.

### **Publication of your CIF in IUCr journals**

A basic structural check has been run on your CIF. These basic checks will be run on all CIFs submitted for publication in IUCr journals (*Acta Crystallographica*, *Journal of Applied Crystallography*, *Journal of Synchrotron Radiation*); however, if you intend to submit to *Acta Crystallographica Section C* or *E* or *IUCrData*, you should make sure that full publication checks are run on the final version of your CIF prior to submission.

### **Publication of your CIF in other journals**

Please refer to the *Notes for Authors* of the relevant journal for any special instructions relating to CIF submission.

---

**PLATON version of 02/02/2025; check.def file version of 02/02/2025**

**Datablock mu230926a3\_a - ellipsoid plot**

ORTEP drawing of (*P*)-**1b** showing thermal ellipsoids at the 50% probability level.

Single colorless crystals of (*P*)-**1b** were obtained by vapour diffusion of hexane into a methanol solution of the compound at room temperature.

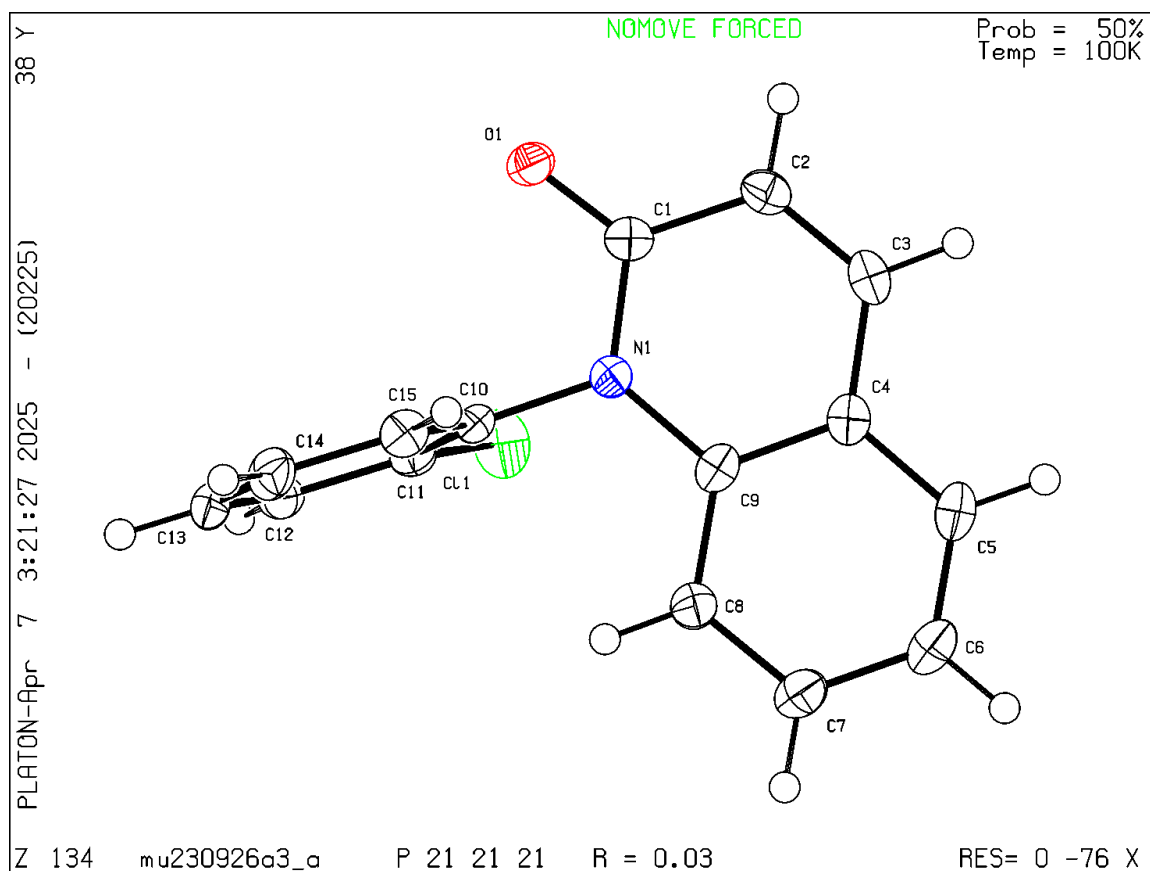

## checkCIF/PLATON report

### *rac-2a*

Structure factors have been supplied for datablock(s) MU240702b2\_1\_a

THIS REPORT IS FOR GUIDANCE ONLY. IF USED AS PART OF A REVIEW PROCEDURE FOR PUBLICATION, IT SHOULD NOT REPLACE THE EXPERTISE OF AN EXPERIENCED CRYSTALLOGRAPHIC REFEREE.

No syntax errors found.      CIF dictionary      Interpreting this report

### Datablock: MU240702b2\_1\_a

---

|                        |                         |                        |                         |
|------------------------|-------------------------|------------------------|-------------------------|
| Bond precision:        | C-C = 0.0041 Å          | Wavelength=0.71073     |                         |
| Cell:                  | a=13.516(4)<br>alpha=90 | b=12.303(4)<br>beta=90 | c=15.757(5)<br>gamma=90 |
| Temperature:           | 100 K                   |                        |                         |
|                        | Calculated              | Reported               |                         |
| Volume                 | 2620.2(14)              | 2620.1(13)             |                         |
| Space group            | P b c a                 | P b c a                |                         |
| Hall group             | -P 2ac 2ab              | -P 2ac 2ab             |                         |
| Moiety formula         | C15 H10 Br N S          | C15 H10 Br N S         |                         |
| Sum formula            | C15 H10 Br N S          | C15 H10 Br N S         |                         |
| Mr                     | 316.20                  | 316.21                 |                         |
| Dx, g cm <sup>-3</sup> | 1.603                   | 1.603                  |                         |
| Z                      | 8                       | 8                      |                         |
| Mu (mm <sup>-1</sup> ) | 3.276                   | 3.276                  |                         |
| F000                   | 1264.0                  | 1264.0                 |                         |
| F000'                  | 1263.09                 |                        |                         |
| h,k,lmax               | 16,14,18                | 16,14,18               |                         |
| Nref                   | 2322                    | 2317                   |                         |
| Tmin,Tmax              | 0.471,0.584             | 0.530,0.620            |                         |
| Tmin'                  | 0.462                   |                        |                         |

Correction method= # Reported T Limits: Tmin=0.530 Tmax=0.620

AbsCorr = MULTI-SCAN

Data completeness= 0.998

Theta(max)= 25.023

R(reflections)= 0.0334( 2019)

wR2(reflections)=

0.0901( 2317)

S = 1.052

Npar= 163

The following ALERTS were generated. Each ALERT has the format

**test-name\_ALERT\_alert-type\_alert-level.**

Click on the hyperlinks for more details of the test.

---

 **Alert level C**  
 PLAT911\_ALERT\_3\_C Missing FCF Refl Between Thmin & STh/L= 0.595 5 Report  
                   4 0 0,        0 0 2,        6 13 5,        5 12 9,        7 10 11,

---

 **Alert level G**  
 PLAT883\_ALERT\_1\_G Absent Datum for \_atom\_sites\_solution\_primary .. Please Do !  
 PLAT899\_ALERT\_4\_G SHELXL2018 is Outdated and Succeeded by SHELXL 2019/3 Note  
 PLAT909\_ALERT\_3\_G Percentage of I>2sig(I) Data at Theta(Max) Still 74% Note  
 PLAT913\_ALERT\_3\_G Missing # of Very Strong Reflections in FCF .... 1 Note  
                   4 0 0,  
 PLAT969\_ALERT\_5\_G The 'Henn et al.' R-Factor-gap value ..... 1.835 Note  
                   Predicted wR2: Based on SigI\*\*2 4.91 or SHELX Weight 8.56  
 PLAT978\_ALERT\_2\_G Number C-C Bonds with Positive Residual Density. 3 Info

---

0 **ALERT level A** = Most likely a serious problem - resolve or explain

0 **ALERT level B** = A potentially serious problem, consider carefully

1 **ALERT level C** = Check. Ensure it is not caused by an omission or oversight

6 **ALERT level G** = General information/check it is not something unexpected

1 ALERT type 1 CIF construction/syntax error, inconsistent or missing data

1 ALERT type 2 Indicator that the structure model may be wrong or deficient

3 ALERT type 3 Indicator that the structure quality may be low

1 ALERT type 4 Improvement, methodology, query or suggestion

1 ALERT type 5 Informative message, check

---



---



It is advisable to attempt to resolve as many as possible of the alerts in all categories. Often the minor alerts point to easily fixed oversights, errors and omissions in your CIF or refinement strategy, so attention to these fine details can be worthwhile. In order to resolve some of the more serious problems it may be necessary to carry out additional measurements or structure refinements. However, the purpose of your study may justify the reported deviations and the more serious of these should normally be commented upon in the discussion or experimental section of a paper or in the "special\_details" fields of the CIF. checkCIF was carefully designed to identify outliers and unusual parameters, but every test has its limitations and alerts that are not important in a particular case may appear. Conversely, the absence of alerts does not guarantee there are no aspects of the results needing attention. It is up to the individual to critically assess their own results and, if necessary, seek expert advice.

### **Publication of your CIF in IUCr journals**

A basic structural check has been run on your CIF. These basic checks will be run on all CIFs submitted for publication in IUCr journals (*Acta Crystallographica*, *Journal of Applied Crystallography*, *Journal of Synchrotron Radiation*); however, if you intend to submit to *Acta Crystallographica Section C* or *E* or *IUCrData*, you should make sure that full publication checks are run on the final version of your CIF prior to submission.

### **Publication of your CIF in other journals**

Please refer to the *Notes for Authors* of the relevant journal for any special instructions relating to CIF submission.

---

**PLATON version of 02/02/2025; check.def file version of 02/02/2025**

**Datablock MU240702b2\_1\_a - ellipsoid plot**

ORTEP drawing of **rac-2a** showing thermal ellipsoids at the 50% probability level.

Single yellow crystals of **rac-2a** were obtained from slow evaporation of hexane- methanol (1:1) mixture at room temperature.

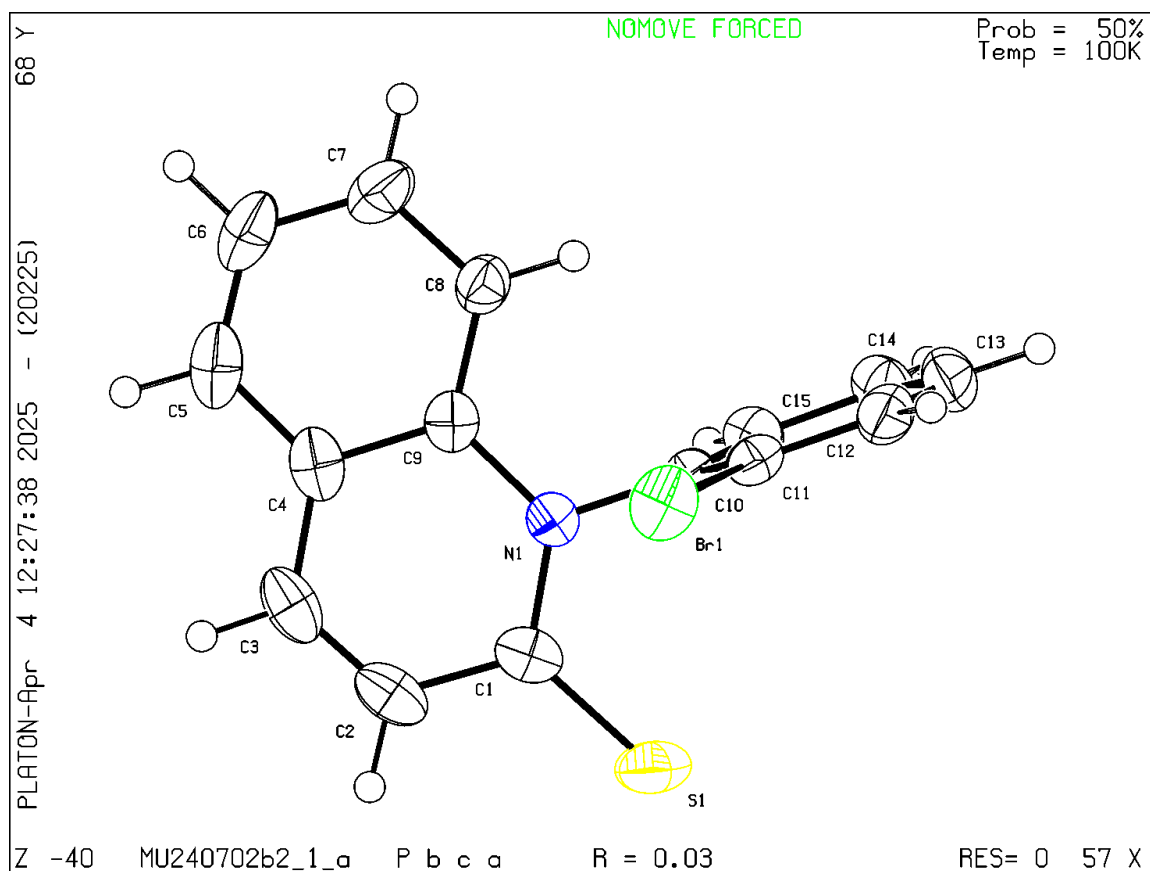

Supplement: Additional file 1 [file 1860-5397-21-138-S1.pdf]
